# Supplementary material for: Anterior CNS expansion driven by brain transcription factors
Source: eLife. 2019 Jul 4;8:e45274. doi: 10.7554/eLife.45274 (PMC6634974; doi:10.7554/eLife.45274)
Supplement: Source data 1. [file elife-45274-data1.xlsx]

## Sheet: Figure 1
					P-values
				0.05	0.01	0.001
	Fig 1H, PH3 NBs in brain lobes			*	**	***
	Brain lobe	oregonR st 13	otpST1/otp,Rx,hbnDf	RxST1/otp,Rx,hbn Df	otp,Rx,hbn Df	erm7779/erm8000	DocA/Doc123	tllI47/tllDf
	1	23	20	16	15	26	14	5
	2	19	30	13	21	24	18	6
	3	24	28	23	15	25	20	10
	4	29	23	29	18	23	14	5
	5	20	27	19	18	22	17	3
	6	32	25	26	16	16	20	4
	7	22	25	33	11	25	15	6
	8	28		23	19	20	17	4
	9	16		28	16	16	31	6
	10	32		19	18	15	21	2
	11	24			15		25
							22
	SD	5.26049	3.30944	6.24411	2.65946	4.18463	4.92674	2.18327
	SEM	1.5861	1.25085	1.97456	0.801857	1.3233	1.42223	0.690411
	T test		0.636199	0.547154	0.000482502	0.131891	0.0303941	3.0541e-08
	Av	24.4545	25.4286	22.9	16.5455	21.2	19.5	5.1
	Fig 1G, PH3 GMCs in brain lobes
	Brain lobe	oregonR st 13	otpST1/otp,Rx,hbnDf	RxST1/otp,Rx,hbn Df	otp,Rx,hbn Df	erm7779/erm8000	DocA/Doc123	tllI47/tllDf
	1	32	40	23	30	31	16	15
	2	41	28	30	39	30	31	6
	3	39	31	32	29	23	25	9
	4	32	47	38	27	33	27	8
	5	41	42	28	30	31	23	7
	6	55	46	35	33	27	24	11
	7	49	35	41	21	26	16	14
	8	47		35	31	30	20	8
	9	27		42	32	23	28	11
	10	35		34	23	19	21	8
	11	31			37		31
	12						22
	13						24
	SD	8.66025	7.3225	5.84618	5.32575	4.49815	4.83709	2.98329
	SEM	2.61116	2.76765	1.84872	1.60577	1.42244	1.45817	0.943398
	T test		0.882689	0.121847	0.010647	0.00127643	0.000102607	1.33454e-07
	Av	39	38.4286	33.8	30.1818	27.3	23.6923	9.7
	Fig 1J, PH3 NBs in Cell death mutant brain lobes
	Brain lobe	ED225-/-	otp,Rx,hbn Df, ED225-/-	erm7779/erm8000, ED225-/-	DocA/Doc123, ED225-/-	tll I47/tll Df, ED225-/-
	1	26	16	21	12	5
	2	35	17	17	11	3
	3	36	16	26	24	7
	4	32	16	23	26	6
	5	30	19	31	23	10
	6	29	15	27	17	5
	7	22	20	13	16	4
	8	28	22	23	18	8
	9	31		21	16	4
	10	24		21	9	2
	SD	4.49815	2.44584	5.07828	5.71159	2.41293
	SEM	1.42244	0.864736	1.60589	1.80616	0.763035
	T test		5.32194e-06	0.00438418	6.26799e-05	7.45989e-10
	Av	29.3	17.625	22.3	17.2	5.4
	Fig 1I, PH3 GMCs in cell death mutant brain lobes
	Brain lobe	ED225-/-	otp,Rx,hbn Df, ED225-/-	erm7779/erm8000, ED225-/-	DocA/Doc123, ED225-/-	tll I47/tll Df, ED225-/-
	1	49	24	51	29	2
	2	53	31	29	30	5
	3	68	31	32	26	8
	4	62	42	28	38	12
	5	44	36	44	40	9
	6	59	35	29	43	5
	7	41	43	41	41	8
	8	52	36	42	40	13
	9	60		21	38	9
	10	55		34	36	9
	SD	8.3006	6.18177	9.12201	5.76291	3.29983
	SEM	2.62488	2.18559	2.88463	1.82239	1.0435
	T test		3.17784e-05	0.000112464	3.28166e-05	1.81375e-09
	Av	54.3	34.75	35.1	36.1	8
	Fig 1N, Total NBs in brain lobes
	Brain lobe	oregonR st 13	otp,Rx,hbn Df	erm7779/erm8000	DocA/Doc123	tllI47/tllDf
		112	94	108	83	30
		119	92	111	83	29
		109	92	92	99	23
		136	81	105	100	34
		123	77	94	96	41
		112	89	102	78	30
		100	81	103	93	32
		91	96	99	84	21
		85	75	98	85	32
		108	107	104	107	20
		104			88
	SD	14.3178	9.89051	5.94792	9.04835	6.40833
	SEM	4.31699	3.12765	1.8809	2.72818	2.02649
	T test		0.00115631	0.13902	0.00216331	1.03251e-10
	Av	109	88.4	101.6	90.5455	29.2
	Fig 1O, Pntp1+ Dpn+ count in brain lobes
	Brain lobe	OrR	Otp, Rx, hbn-/-	erm-/-	Doc-/-	Tll-/-
	1	11	5	13	9	0
	2	11	4	13	5	0
	3	12	6	11	6	0
	4	11	6	9	5	0
	5	14	4	10	8	1
	6	9	4	12	6	0
	7	12	6	12	4	0
	8	11		13	5	0
	9			13	6	0
	10			13	7	0
	11				6	0
	12				5	0
	Av	11.375	5	11.9	6	0.0833333
	SD	1.40789	1	1.44914	1.41421	0.288675
	SEM	0.497763	0.377964	0.458258	0.435985	0.0833333
	T test		1.97191e-07	0.449582	4.59145e-07	4.61316e-08
	Fig 1P, wac cluster size in erm mutant
	TOTAL CELLS	ADM=Anterior Dorso Medial		PDM+ Posterior Dorso Medial		DL=Dorso Lateral
	Brain lobe	ADM Control	ADM erm Df	PDM Control	PDM erm Df	DL Control	DL erm Df
	1	5	2	6	5	15	3
	2	4	4	14	4	18	7
	3	4	0	9	5	14	6
	4	4	3	15	2	12	9
	5	4	2	10	7	17	5
	6	8	4	8	11	14	7
	7	4	4	8	5	12	5
	8	8	7	13	5	15	6
	9	4	3	15	7	13	10
	10	0	0	8	4	18	9
	11	3	4	16	6	14	9
	Av	4.36364	3	11.0909	5.54545	14.7273	6.90909
	SD	2.2033	2	3.56243	2.29624	2.149	2.16585
	SEM	0.664321	0.603023	1.07411	0.692343	0.647947	0.653029
	T test		0.144335		0.000440745		4.52592e-08
	Fig 1Q, wac cluster neuroblasts in erm mutant
		ADM=Anterior Dorso Medial		PDM+ Posterior Dorso Medial		DL=Dorso Lateral
		ADM Control	ADM erm Df	PDM Control	PDM erm Df	DL Control	DL erm Df
	Brain lobe	2	2	3	2	2	1
	1	1	2	3	3	2	2
	2	1	2	3	2	2	3
	3	2	2	3	2	2	3
	4	2	2	3	3	2	2
	5	2	2	3	2	2	2
	6	1	2	3	2	2	2
	7	1	2	3	2	2	2
	8	3	2	3	4	2	3
	9	1	2	3	2	2	2
	10	0	2	3	3	2	2
	Av	1.45455	2	3	2.45455	2	2.18182
	SD	0.8202	0	0	0.687552	0	0.603023
	SEM	0.247299	0	0	0.207305	0	0.181818
	T test		0.0519424		0.0251115		0.340893

## Sheet: Figure 2
Figure 2C. Dividing NBs and dividing daughters																		P-values
NBs		UAS-															0.05	0.01	0.001
Case Nr	Control	erm	tll	otp	Doc2	erm, tll	erm, Doc2	tll, otp	tll, otp, erm,	erm, Doc2, tll	erm, Doc2, otp	erm, Doc2, tll, otp					*	**	***
1	0	1	4	3	1	0	1	1	4	2	4	7
2	0	1	3	3	1	1	1	2	8	3	4	13					T-test elav> tll, elav>erm		T test elav>tll, elav>tll, erm		T test elav>erm, elav>tll, erm
3	0	0	2	6	0	1	0	11	4	12	16	16					GMC	NB	GMC	NB	GMC	NB
4	0	5	3	13	5	0	5	3	9	16	12	8					0.000533054	0.891341	0.0111543	0.00199126	0.00127912	0.107053
5	0	7	2	0	7	1	7	11	13	7	5	20
6	0	7	7	1	7	0	7	15		7	11	23
7	0		5	3		0		13		4	14	16
8	0		3	3		0		5			9	17
9	0		2	1		2		15			10	21
10	0		2			4		3			11	9
11								9
Av	0	3.5	3.3	3.66667	3.5	0.9	3.5	22.8182	7.6	7.28571	9.6	15
SD	0	3.20936	1.63639	3.90512	3.20936	1.28668	3.20936	8.29238	3.78153	5.08967	4.14193	5.61743
SEM	0	1.31022	0.517472	1.30171	1.31022	0.406885	1.31022	2.50025	1.69115	1.92372	1.30979	1.77639
Daughters		UAS-
Case Nr	Control	erm	tll	otp	Doc2	erm, tll	erm, Doc2	tll, otp	tll, otp, erm,	erm, Doc2, tll	erm, Doc2, otp	erm, Doc2, tll, otp
1	0	25	4	17	26	3	26	16	17	30	39	22
2	0	18	2	27	19	10	19	18	26	29	39	39
3	0	21	2	13	21	9	21	39	16	38	76	59
4	0	26	6	11	31	11	31	24	26	42	41	45
5	0	36	7	11	43	8	43	28	28	44	49	94
6	0	19	4	17	26	21	26	30		22	33	53
7	0		4	18		4		29		11	42	65
8	0		3	15		9		18			54	40
9	0		3	12		13		24			37	49
10	0		7			6		13			46	27
11	0							12
Av	0	24.1667	4.2	15.6667	27.6667	9.4	27.6667	22.8182	22.6	30.8571	45.6	49.3
SD	0	6.61564	1.8738	5.02494	8.61781	5.10338	8.61781	8.29238	5.63915	11.725	12.2945	20.5645
SEM	0	2.70082	0.592546	1.67498	3.51821	1.61383	3.51821	2.50025	2.5219	4.43164	3.88787	6.50308
Fig. 2D, Total cells in Elav>erm, tll and Elav>Tetra (DAPI count)							Fig. 2H, NBs in Elav>erm, tll and Elav>Tetra
	cell number
Case	elav-Gal4/OrR	elav>tll, erm	elav> Tetra					elav>Control, tll, erm, tetra NBs, T2-T3, St 13						elav>Control, tll, erm, tetra NBs, T2-T3, St 13 by segment
1	5150.44	3716.35	9376.86
2	4775.54	4647.88	8029.41				Case	elav-Gal4/OrR	elav>tll, erm	elav> Tetra			Case	elav-Gal4/OrR	elav>tll, erm	elav> Tetra
3	3555.33	4286.95	5488.81				1	125	158	153			1	62.5	79	76.5
4	6152.08	5278.33	7290.76				2	123	157	159			2	61.5	78.5	79.5
5	4460.24	5021.96	5406.89				3	107	139	149			3	53.5	69.5	74.5
6	3682.43	5226.69	7292.19				4	105	147	151			4	52.5	73.5	75.5
7	3156.17	5303.58	5022.97				5	110	153	140			5	55	76.5	70
8	5233.07	5659.82	5674.34				6	105	139	121			6	52.5	69.5	60.5
9	3616.66	6079.1	7131.38				7	85	131	142			7	42.5	65.5	71
10		6577.06	7953.15				8	110	148	141			8	55	74	70.5
							9	125	118	156			9	62.5	59	78
Average	4420.22	5179.77	6866.68				10	124	142	124			10	62	71	62
SD	991.025	834.364	1418.72
SEM	330.342	263.849	448.637				Average	111.9	143.2	143.6			Average	55.95	71.6	71.8
T-test		0.0915918	0.000450222				SD	12.7493	12.309	12.8253			SD	6.37465	6.15449	6.41266
							SEM	4.03168	3.89244	4.05572			SEM	2.01584	1.94622	2.02786
							T-test	1.80784e-10	2.67622e-05	2.9105e-05			T-test	9.74522e-12	2.67622e-05	2.9105e-05
Fig 2K, NB 5-6 cells, Control vs erm, tll vs Tetra
	wg>Control, tll, erm, Tetra 5-6 lineage, T2-T3, St 13
Case	wg-Gal4/OrR	elav>tll, erm	wg> Tetra
1	17	24	30
2	21	28	30
3	24	23	24
4	20	29	27
5	20	30	25
6	19	26	20
7	15	26	26
8	16	23	27
9	18	27	23
10	18	28	25
11	22	25	25
12	21	23	27
13	19	22	25
14	19	24	22
15	17	32	25
16	20	22	25
17	20	25	20
18	19	25	31
19	18	26	28
20	19	24	22
21	20	24	27
22	18	23	32
23	17	22	33
24	17	24	26
25	20	24	33
26	21	24	26
27	22	21	25
28	18	23	22
29	18	24	27
30	18	21	23
31	17	25	18
32	19	23	24
33	22	33
34	19	24
35	18	23
36	19	25
37	18	26
38	17	26
39	19	26
Av	18.9487	24.9487	25.7188
SD	1.83459	2.70427	3.6565
SEM	0.29377	0.43303	0.646383
T test		1.93518e-17	3.10827e-12

## Sheet: Fig4+S10 DpnAse embryo and wing
Figure 4D.
Control
T2	Dpn+Ase+	Dpn+Ase-	Dpn-Ase+	Dpn+
1da-G4	59	5	71	64
2da-G4	61	3	62	64
3da-G4	60	4	72	64		Summary % of Dpn cells
4da-G4	48	4	76	52			Dpn+Ase+	Dpn+Ase-	Dpn-Ase+
5da-G4	62	5	57	67		Da-Gal4/+	0.09	0.01	0.13
						Da> Double	0.82	0.18	0.9
average	58	4.2	67.6	62.2		Da>Tetra	0.81	0.19	0.91
SEM	2.54951	0.374166	3.50143	2.61534
SD	5.70088	0.83666	7.82943	5.84808
percentage of NBs	9.1654	1.34511	12.5875			Q-Vg-Gal4/+	0	0	0
						Q-Vg>Double	88.4236	11.5764	74.1379
Da>double						Q-Vg>Tetra	78.5714	21.4286	69.0476
T2	Dpn+Ase+	Dpn+Ase-	Dpn-Ase+	Dpn+
1-1da>erm, tll	66	15	72	81
1-2da>erm, tll	61	18	64	79
1-3da>erm, tll	65	13	75	78
1-4da>erm, tll	56	11	68	67
1-5da>erm, tll	64	12	65	76
Av	62.4	13.8	68.8	76.2
SEM	1.80555	1.24097	2.08327	2.43721
SD	4.03733	2.77489	4.65833	5.44977
t test with control	0.200664	0.000902449	0.777513	0.00448549
Percentage of NBs	81.8898	18.1102	90.2887
Da>tetra
T2	Dpn+Ase+	Dpn+Ase-	Dpn-Ase+	Dpn+
1-da>tetra	51	18	52	69
3-da>tetra	62	16	50	78
4-da>tetra	54	14	61	68
5-da>tetra	55	8	86	63
6-da>tetra	63	12	74	75
				0
Av	57	13.6	64.6	70.6
SEM	2.34521	1.72047	6.82349	2.65707
SD	5.24404	3.84708	15.2578	5.94138
t test with control	0.780219	0.00458124	0.709255	0.0543158
Percentage of NBs	80.7365	19.2635	91.5014
Figure S10 G-I	All wing disc quantitations have been measured in a 2387 um2 area
control
wing	Dpn+Ase+	Dpn+Ase-	Dpn-Ase+	Dpn+
vg-Gal4/+1	0	0	0	0
vg-Gal4/+2	0	0	0	0
vg-Gal4/+3	0	0	0	0				P-values
							0.05	0.01	0.001
vg>double wing							*	**	***
wing	Dpn+Ase+	Dpn+Ase-	Dpn-Ase+	Dpn+
vg>erm, tll wing 1	78	7	47	85
vg>erm, tll wing 2	130	14	98	144
vg>erm, tll wing 3	91	14	65	105
vg>erm, tll wing 4	60	12	91	72
Av	89.75	11.75	75.25	101.5
SEM	14.8457	1.65202	11.7925	15.7083
SD	29.6915	3.30404	23.585	31.4166
T-Test Double-Tetra	0.0121941	0.00736203	0.00656207	0.00993393
Percentage of NBs	88.4236	11.5764	74.1379
vg>tetra
Wing	Dpn+Ase+	Dpn+Ase-	Dpn-Ase+	Dpn+
vg>Tetra wing 1	15	5	20	20
vg>Tetra wing 2	10	2	8	12
vg>Tetra wing 3	8	2	1	10
Av	11	3	9.66667	14
SEM	1.47196	0.707107	3.92287	2.16025
SD	3.60555	1.73205	9.60902	5.2915
Percentage of NBs	78.5714	21.4286	69.0476	100

## Sheet: Figure 6
Fig 6J, Hox expression when brain genes are ectopically expressed
	Ubx levels in A1, 3 embryos					AbdA levels in A5, 3 embryos					Abd-B in A9-A10, 3 embryos						P-values				Fig6O. Rx intensity in esc and control B1-B2 NBs, 6 brain lobes
Cell Nr	Control	pros>erm, tll	pros>Tetra		Cell Nr	Control	pros>erm, tll	pros>Tetra		Cell Nr	Control	pros>erm, tll	pros>Tetra							Cell Nr	control	esc
	Normalyzed fluorescence	Normalyzed fluorescence	Normalyzed fluorescence			Normalyzed fluorescence	Normalyzed fluorescence	Normalyzed fluorescence			Normalyzed fluorescence	Normalyzed fluorescence	Normalyzed fluorescence			0.05	0.01	0.001			Normalyzed fluorescence	Normalyzed fluorescence
1	1.10283	0.645308	0.786298		1	1.62241	2.11821	0.749101		1	3.47801	0.44234	2.27509			*	**	***		1	1.39552	1.14531			Test for normal distribution	control	esc
2	1.37403	0.388871	0.597073		2	1.46355	1.58223	0.988969		2	3.75852	0.478121	1.92311							2	2.39	1.35429
3	0.85861	0.427109	0.684131		3	0.7588	0.628622	1.43882		3	4.52944	0.314265	0.664369							3	2.46045	1.28088			Shapiro-Wilk test
4	2.48718	0.326419	1.14366		4	0.323489	0.425304	1.59038		4	3.70004	0.350541	0.573266							4	1.56074	2.05252			W	0.7745	0.8006
5	0.720006	0.230026	1.43326		5	0.726564	0.535061	0.773237		5	3.23315	0.370216	0.726453							5	1.80488	1.29216			P value	<0.0001	<0.0001
6	0.999407	1.09946	0.742865		6	1.47187	5.07623	1.06987		6	3.92276	0.39603	1.00644							6	1.4865	1.16735			Passed normality test (alpha=0.05)?	No	No
7	1.02994	0.373391	0.736917		7	1.06591	0.626745	0.760083		7	5.07845	0.186064	0.400288							7	1.74234	1.25222			P value summary	****	****
8	1.59802	1.23992	0.990168		8	1.0307	1.21238	0.707626		8	2.67169	0.250742	0.306856							8	1.67445	0.86498
9	1.13838	0.947109	1.07514		9	1.12473	0.521366	0.515498		9	1.2472	0.344963	0.333727							9	1.36539	0.985171			Kolmogorov-Smirnov test
10	1.82832	0.695065	0.786955		10	0.44816	0.928876	1.6803		10	2.51795	0.368626	0.559886							10	1.94825	1.06214			KS distance	0.1966	0.1869
11	1.02427	0.676276	0.368068		11	1.51657	0.97514	0.704072		11	2.48506	0.323399	1.23039							11	2.78255	1.41896			P value	<0.0001	<0.0001
12	0.908312	1.11135	0.582328		12	0.836877	0.770677	1.55753		12	1.28487	0.636885	1.05332							12	1.62413	1.22266			Passed normality test (alpha=0.05)?	No	No
13	1.43023	0.638554	0.352046		13	0.891547	0.891617	1.02604		13	1.02105	0.473255	0.535616							13	2.52512	0.673877			P value summary	****	****
14	2.47028	0.740684	0.54845		14	1.37295	0.758006	1.35257		14	1.96506	0.505578	0.45863							14	0.916764	1.04264
15	1.1987	0.792307	0.252411		15	0.34622	1.29358	1.19631		15	1.56368	0.35634	0.251095							15	1.14336	0.555625			Number of values	620	622
16	1.32854	1.173	0.262975		16	0.644163	0.962681	0.652825		16	1.55519	0.374727	0.594514							16	1.21724	2.53971
17	1.36538	0.313803	0.841763		17	2.11897	1.82194	0.834095		17	0.518112	0.299883	0.508568							17	1.00937	0.413286
18	1.32967	0.382502	0.730558		18	1.31691	1.26734	0.707447		18	1.04186	0.319095	0.489028							18	1.0278	0.497209
19	1.02971	0.59987	0.66527		19	2.30101	0.810679	2.11944		19	1.256	0.519848	0.334032							19	1.3424	0.572812
20	0.860967	0.645	0.475861		20	2.5414	1.09506	1.0894		20	0.618901	0.364575	0.657441							20	1.49897	0.654887			Table Analyzed	Data 1
21	2.14401	0.857487	0.838822		21	1.64446	1.10649	0.763021		21	1.22304	0.60383	1.13973							21	1.60097	0.544501
22	1.66583	0.835636	1.03298		22	1.53702	1.15137	0.769002		22	2.81071	0.304938	0.747789							22	1.41333	0.285578			Column B	esc
23	1.98639	0.536977	0.974139		23	1.18004	2.25451	0.759808		23	3.20021	0.138659	0.706424							23	1.53504	0.555957			vs.	vs.
24	1.40663	0.174632	0.644748		24	2.2865	0.798028	1.83003		24	3.3164	0.205408	0.682016							24	1.48485	1.10848			Column A	control
25	1.1623	0.213694	0.669009		25	0.435957	1.19451	0.587022		25	3.64635	0.259652	0.379396							25	1.97148	0.494515
26	1.29685	0.30713	0.543213		26	0.983829	1.09868	0.617611		26	3.82387	0.189415	0.383567							26	2.08887	0.534547			Mann Whitney test
27	1.99574	0.459448	0.866902		27	1.31393	1.59025	3.40033		27	2.82288	0.262967	0.660006							27	1.77879	0.481659			P value	<0.0001
28	1.14548	0.295409	0.974161		28	0.576435	0.692516	0.825317		28	2.29745	0.409949	0.551527							28	3.06383	0.518451			Exact or approximate P value?	Approximate
29	1.51407	0.315251	0.719226		29	0.819139	0.638487	1.16603		29	2.94515	0.482945	0.549906							29	1.56892	0.765579			P value summary	****
30	1.05751	0.789908	1.15713		30	0.612268	1.27587	2.0197		30	2.60383	0.331746	0.487583							30	2.34093	0.300285			Significantly different (P < 0.05)?	Yes
31	1.18637	0.978559	1.14502		31	0.629955	0.425335	1.13023		31	2.70455	0.515595	0.816861							31	4.04654	0.543973			One- or two-tailed P value?	Two-tailed
32	1.40509	0.882991	0.646788		32	0.665606	0.859121	0.922482		32	2.76496	0.406204	0.234457							32	0.62484	0.387452			Sum of ranks in column A,B	458627 , 313276
33	0.3112	0.785387	0.386002		33	1.77328	2.33583	2.11411		33	1.58688	0.287811	0.403548							33	1.47014	0.424411			Mann-Whitney U	119523
34	0.43401	0.852499	0.351344		34	1.16325	1.30365	1.97078		34	0.550188	0.482624	0.877891							34	0.492158	0.603258
35	1.02768	0.473983	1.08925		35	0.864189	0.502926	0.744151		35	0.884129	0.170802	0.52975							35	0.884271	1.11816			Difference between medians
36	0.817106	0.43754	0.296276		36	1.20355	0.350626	0.472322		36	0.772802	0.209187	0.225454							36	1.07677	0.377916			Median of column A	57695, n=620
37	0.536662	0.98642	0.920527		37	0.747964	1.75632	0.822519		37	0.562069	0.622886	0.236961							37	0.49439	0.439531			Median of column B	41229, n=622
38	1.06489	0.296461	0.560931		38	0.478302	0.9992	0.802835		38	0.603131	0.424408	0.573246							38	0.546582	0.415459			Difference: Actual	-16466
39	1.12758	0.642165	0.86966		39	0.348177	1.0443	0.994913		39	0.504418	0.333473	0.688523							39	1.7112	0.615891			Difference: Hodges-Lehmann	-16992
40	1.2795	0.486398	0.588663		40	0.614231	0.604298	0.954698		40	0.534883	0.341878	0.640841							40	0.761911	0.436989
41	0.95866	0.383707	0.140789		41	0.851721	0.433075	0.584271		41	0.704447	0.391336	0.485129							41	0.420441	0.514748
42	1.04763	0.416479	0.948525		42	1.34366	0.379745	1.34826		42	0.954236	0.621569	0.720683							42	0.803863	1.09536
43	0.915947	1.22272	0.863856		43	1.2476	0.870764	0.540965		43	0.861382	0.281327	0.372427							43	0.425684	0.342802
44	1.08757	0.611744	1.16968		44	1.38651	0.60019	1.49066		44	0.779968	0.284384	0.32461							44	1.33099	0.350766
45	0.907792	0.565366	0.517742		45	1.24209	0.567966	0.589915		45	0.678455	0.500949	0.709492							45	0.970656	0.535299
46	1.44908	0.921423	0.455973		46	1.00424	1.08689	0.345909		46	0.682705	0.109114	0.621184							46	1.04404	0.517133
47	1.04768	0.898973	0.616422		47	1.35084	0.23085	1.01513		47	0.705144	0.558948	0.500813							47	0.845025	1.45095
48	0.642417	0.706438	0.484065		48	0.509558	0.656576	0.740492		48	0.479363	0.241992	0.500792							48	0.828146	1.75963
49	0.826937	0.534834	0.98943		49	0.906741	1.806	3.13927		49	0.42157	0.310218	0.542777							49	0.790248	0.628702
50	0.370255	0.428791	1.04764		50	0.760628	1.14683	2.08501		50	0.601995	0.721249	0.535205							50	0.845239	0.435906
51	0.462171	0.403613	1.15979		51	1.83059	1.04102	0.802953		51	0.536826	0.549099	0.439703							51	0.565568	0.596745
52	0.416005	0.872638	0.842817		52	1.02865	0.615842	1.38891		52	0.364966	0.382286	0.365605							52	0.721029	0.842518
53	0.914195	0.796626	1.03297		53	1.13988	0.569297	0.57956		53	0.458863	0.319833	0.183908							53	0.403079	0.529057
54	1.16815	1.02069	0.625047		54	0.943271	0.488742	0.663978		54	0.380971	0.335234	0.681411							54	0.706068	1.00631
55	0.58512	1.30102	1.20203		55	0.676408	0.374172	1.21265		55	0.760367	2.18007	0.664052							55	0.823575	0.680761
56	0.642477	1.00291	2.17106		56	0.276666	0.35041	0.751993		56	1.06047	0.385896	0.645549							56	0.805353	0.459674
57	0.44578	1.21124	1.52286		57	0.273568	0.611572	0.532779		57	0.551142	0.468281	0.244208							57	0.689206	0.231811
58	0.183068	0.91296	1.97244		58	0.34578	0.523201	0.7182		58	0.837314	0.625866	0.651477							58	0.461476	0.383662
59	0.57828	0.673236	0.67848		59	0.726373	1.10844	0.703216		59	0.806726	0.356084	0.786595							59	0.461476	0.827624
60	0.710499	0.395941	0.45573		60	2.0955	0.446918	1.24665		60	0.544261	0.40603	0.492991							60	0.677016	0.481932
61	0.845162	0.457454	0.416896		61	0.579418	0.593806	1.60259		61	1.07711	0.392511	0.214443							61	0.730608	0.869205
62	0.79425	0.547263	0.559928		62	0.614411	0.365494	0.561363		62	0.675587	0.393388	0.392674							62	0.590198	1.13184
63	0.639448	1.18925	1.10425		63	1.52151	0.581446	0.829147		63	0.334618	0.115528	0.47726							63	0.526793	0.332169
64	1.13418	0.728359	1.60734		64	0.679871	0.261302	0.655592		64	0.575988	0.221176	0.469758							64	0.349036	0.446627
65	1.58432	0.811231	0.831023		65	0.514351	0.45144	3.30085		65	1.51214	0.907411	0.19							65	0.523066	0.650271
66	2.17364	1.09357	0.736638		66	1.29921	0.202212	0.759013		66	0.725043	0.405786	0.386852							66	0.505781	0.344029
67	1.10157	0.782417	0.805531		67	1.49691	0.671408	1.25939		67	0.395566	0.397053	0.697783							67	0.702695	0.354181
68	1.09654	0.560772	0.964328		68	1.37359	0.721628	0.941467		68	1.81889	0.517312	0.530962							68	0.393385	0.498562
69	1.16352	0.643841	1.12282		69	1.13713	0.496077	2.72048		69	0.955414	0.426078	1.00379							69	0.548005	0.343591
70	0.953551	0.759723	1.75823		70	1.85595	0.706342	0.735868		70	0.465109	0.379258	1.55242							70	0.453384	0.495267
71	0.97177	0.330742	0.979261		71	2.06713	1.14344	0.929417		71	1.14453	0.566842	1.39127							71	0.632737	0.645776
72	0.586272	0.602261	0.478447		72	1.5346	0.958407	0.7037		72	1.40081	0.191601	2.72617							72	0.584097	0.561736
73	0.674516	1.13247	0.530011		73	0.862126	1.32508	1.60627		73	1.22579	0.3983	1.52446							73	1.12714	0.621834
74	0.757354	0.812465	1.29104		74	0.846581	0.290814	1.33623		74	0.315381	0.247892	1.12622							74	0.433045	0.628827
75	1.19692	0.616988	0.559489		75	0.739365	0.297364	1.04031		75	0.457461	0.274104	1.00808							75	0.534364	0.479438
76	0.618264	0.455403	0.817424		76	0.487695	1.09586	1.07716		76	0.235228	0.354341	0.496683							76	0.692994	0.596214
77	1.04915	1.09377	0.544576		77	0.251508	1.47743	2.2961		77	0.887593	0.570714	0.477011							77	0.407717	0.529339
78	0.992274	0.293694	0.865302		78	0.237479	0.549753	0.766037		78	0.9578	0.405075	0.677803							78	0.701947	0.29565
79	1.2787	0.211729	0.787743		79	2.09735	0.504606	0.299085		79	0.500923	0.442062	1.18405							79	0.360019	0.410355
80	1.15687	0.69459	0.783157		80	0.706611	0.591272	0.789914		80	0.543685	0.197155	0.349169							80	1.39542	0.586089
81	0.31445	0.830851	0.806674		81	1.00699	0.272399	0.842112		81	0.251907	0.19351	0.743684							81	1.07057	0.398522
82	0.959806	0.524865	1.19857		82	0.805625	0.259523	0.482459		82	0.280504	0.228289	0.440564							82	0.364432	0.513367
83	0.787744	0.698541	0.695464		83	0.663104	0.237747	0.494678		83	0.358118	0.232871	0.614264							83	0.367056	0.476492
84	0.259995	0.365321	0.520962		84	2.06398	0.285013	0.55043		84	0.541554	0.464817	0.35904							84	0.288847	0.606485
85	0.301525	0.373486	0.970564		85	0.864808	0.433625	0.943914		85	0.34481	0.586058	1.34971							85	1.16711	0.328012
86	0.574869	0.353747	0.787981		86	0.330496	0.666511	2.31823		86	0.382829	0.545092	0.185641							86	0.628731	0.345161
87	0.541376	0.659483	0.577792		87	1.9062	0.603034	0.542047		87	0.363465	0.555427	0.958605							87	0.640456	0.249486
88	0.886	0.787032	0.698602		88	1.10044	0.238459	0.592144		88	0.299625	0.31622	0.468421							88	0.526058	0.805716
89	1.30947	1.05589	0.585522		89	1.24386	0.464494	1.13753		89	0.31768	0.723511	0.432418							89	0.568018	0.649367
90	1.53902	0.714492	0.566832		90	1.3714	0.687188	0.867299		90	0.174369	0.604392	0.803431							90	1.32493	0.533213
91	0.971485	0.457715	0.96986		91	0.866978	0.565905	0.609649		91	0.337183	0.560764	0.573312							91	0.762988	0.691643
92	1.24222	0.473908	0.763631		92	1.4725	1.14072	0.840375		92	0.232713	0.756669	0.260023							92	1.13996	0.290926
93	1.25517	0.239188	0.734639		93	1.67793	0.457643	3.03537		93	0.231412	0.409703	0.222362							93	0.768517	0.458085
94	0.526555	0.257516	0.433737		94	0.680783	0.451406	1.198		94	0.36662	0.365727	0.807003							94	0.781088	0.688276
95	0.965817	0.338315	0.568704		95	1.47562	0.905164	1.26846		95	1.05917	0.456073	1.00365							95	0.464469	0.215081
96	0.909325	0.41122	0.725035		96	0.743021	1.08343	0.545065		96	0.334259	0.406426	1.38621							96	0.274597	1.94826
97	1.26795	0.754612	0.603702		97	2.25372	1.25276	0.606378		97	0.339997	0.494009	0.819483							97	2.49507	0.844438
98	1.40823	0.396073	0.73763		98	1.71491	0.403666	2.38439		98	0.464223	0.452603	0.38279							98	2.14182	1.28586
99	1.23815	0.277372	0.171788		99	1.40362	0.588131	0.409659		99	0.132426	0.603596	0.557105							99	0.62868	1.22116
100	0.539423	0.735033	0.772649		100	0.809908	0.81295	0.640394		100	0.343359	0.473832	0.514101							100	1.31866	1.28141
101	0.902848	0.481104	0.484921		101	0.535826	0.681546	0.493677		101	1.03108	0.231659	0.151254							101	0.488572	0.763108
102	0.294092	0.782207	0.283055		102	1.33266	0.446445	0.451332		102	0.920156	0.531276	0.375635							102	0.27071	3.66439
103	0.42634	1.11402	0.611233		103	0.526957	0.930809	0.850053		103	0.268197	0.461891	0.731027							103	0.391336	2.02982
104	0.974915	0.977867	0.867832		104	0.554903	0.916561	0.523009		104	0.988964	0.365369	0.376267							104	1.17398	1.34674
105	0.578323	1.1705	0.332142		105	0.657958	0.562081	0.729574		105	0.447745	0.537982	0.355567							105	3.34768	1.05713
106	0.484013	0.880887			106	0.78421	0.261018	0.534869		106	0.292299	0.323944	1.31098							106	1.65033	1.50792
107	0.518727	0.87661			107	0.403705	0.398477	0.947215		107	0.459191	0.492102	0.438464							107	2.13108	1.07867
108	1.03313	0.784765			108	0.89678	0.657788	0.735997		108	0.219961	0.361237	0.605711							108	1.35365	0.855348
109	0.568346	0.86462			109	2.27356	0.454166	0.64727		109	0.484266	0.436937	0.847845							109	3.07312	0.878962
110	1.0638	0.732222			110	1.06669	0.878946	0.413803		110	0.366946	0.461562	0.468913							110	1.20872	1.10767
111	1.3436	0.588102			111	0.9603	0.295754	1.08691		111	0.437321	0.345773	0.132322							111	1.50558	1.1214
112	1.67181	0.42452			112	0.197793	1.01525	0.55372		112	0.2786	0.35653	0.235357							112	1.05571	2.16107
113	1.06251	0.284432			113	0.520264	0.744823	0.5686		113	0.325884	0.543954	0.804868							113	0.732005	0.629251
114	0.587305	0.342233			114	0.370508	0.264518	1.02543		114	0.253038	0.377884	0.785748							114	1.74843	0.505691
115	0.911749	0.425768			115	0.368644	0.511029	1.53271		115	0.415762	0.392421	0.578515							115	1.43938	0.547133
116	0.293507	0.455104			116	0.488858	0.606495	1.28024		116	0.619794	0.364894	0.390671							116	1.92716	0.871172
117	0.73205	0.518053			117	0.359886	0.454333	0.797364		117	0.287532	0.445304	1.40737							117	1.94847	0.537517
118	1.79566	1.30594			118	0.516374	0.51823	0.818413		118	0.227472	0.3311	0.901778							118	1.58691	0.439666
119	0.932254	0.874686			119	0.970008	0.260358	0.872958		119	0.303084	0.594392	0.471955							119	2.20793	0.449169
120	0.97661	1.18763			120	1.33951	0.549234	0.77149		120	0.302501	0.777612	0.893913							120	1.30137	0.764946
121	1.03087	1.27603			121	0.840753	1.47284	0.244296		121	0.450878	0.294024	0.206578							121	1.44339	0.652025
122	1.4492	0.473841			122	0.347449	0.790771	0.591909		122	0.265175	0.872229	0.233792							122	1.26361	0.347018
123	1.02793	0.275572			123	0.85944		0.538854		123	0.384816	0.962535	0.17757							123	1.7214	0.858808
124	0.779629	0.560898			124	0.60414		0.572774		124	0.199604	1.73184	0.69709							124	1.44573	0.41249
125	0.708049	1.41213			125	0.516271		0.330164		125	0.298428	0.676828	0.582409							125	1.03	1.61213
126	1.41066	0.958382			126	0.973845		0.608957		126	0.363794	0.481656	0.498752							126	0.844358	0.969898
127	0.606876	0.817731			127	0.205328		0.5277		127	0.165876	0.553088	0.930892							127	0.931851	0.51325
128	0.734189	0.343269			128	0.787259		0.583655		128	0.167908	0.230021	0.927444							128	2.39455	0.447528
129	0.470385	0.373107			129	0.707471		0.339315		129	0.205735	0.499377	1.97094							129	1.79725	0.337297
130	0.936822	0.5057			130	0.362705		0.548834		130	0.291949	0.471124	0.982133							130	1.10878	0.567518
131	0.961815	0.912959			131	0.570756		0.299435		131	0.320666	0.587959	0.858153							131	0.724243	0.595008
132	0.758701	0.797793								132	0.351014	0.332473	0.615081							132	0.614113	0.605464
133	0.313159	0.850483								133	0.85011	0.403412	0.564852							133	0.910034	0.337226
134	1.60508	0.569779								134	0.437687	0.525884	0.570894							134	0.730959	0.425701
135	0.988512	0.481813								135	0.438314	0.410869	0.669461							135	0.638588	0.357295
136	0.493204979645145+B108B101:B62:B139	0.798582								136	0.363837	0.382669	0.269451							136	1.26565	0.267843
										137	0.777747	0.607962	0.489367							137	1.21612	0.785105
Av	1.00376	0.671598	0.78325		Av	1	0.811139	1		138	0.213819	0.541754	0.262434							138	0.832667	0.421944
SD	0.44299	0.292747	0.351354		SD	0.54025	0.584818	0.622063		139	0.66753	0.736474	0.440598							139	1.04837	0.303513
SEM	0.0381265	0.0251028	0.0342886		SEM	0.0472019	0.052947	0.0543499		140	0.973637	0.363084	0.899022							140	1.22361	0.644375
T test		5.24626e-12	2.48961e-05		T test		0.00826612	0.99998		141	0.706234	0.1472	0.552498							141	0.613834	0.531984
										142	0.650596	0.366604	0.511224							142	0.728756	0.618472
										143	0.387782	0.448026	0.362706							143	0.720134	0.643945
										144		0.527337	0.699798							144	0.827272	0.39328
										145		0.356627	0.938503							145	1.02189	0.444454
										146		0.404734	0.608226							146	1.0843	0.347253
										147		0.747356	0.47018							147	0.850619	0.532278
										148		0.361747	0.350235							148	0.872859	0.245641
										149		0.672807	0.381695							149	0.93693	0.377765
										150		0.830367	0.854387							150	0.568151	0.281223
										151		0.644768	0.571801							151	0.741306	0.387866
										152		0.228993	0.383779							152	1.48598	0.243099
										153		0.467703	0.429104							153	1.24195	0.252471
										154		0.75451	0.506903							154	1.4696	0.212704
										155		1.05207	0.52736							155	0.627832	0.277904
										156		0.427077	0.423359							156	0.643252	0.33757
										157		0.569202	0.378005							157	0.54127	0.335125
										158		0.343008	1.03266							158	0.37813	0.299553
										159		0.795778	0.629218							159	0.583926	0.189589
										160		0.822913	0.664319							160	0.686882	0.344377
										161		0.608927	0.192195							161	0.744141	0.370813
										162		0.562751	0.516917							162	0.543816	0.477338
										163		0.603276	0.110258							163	0.577447	0.594118
										164		0.498597	0.463824							164	0.636976	0.306454
										165		0.435733	0.408695							165	0.717432	0.419866
										166		0.796068	0.529658							166	0.700594	0.226358
										167		0.701407	0.153752							167	0.565314	0.509918
										168		0.375739	0.359899							168	0.562235	0.456179
										169		0.345027	0.704487							169	0.500157	0.507877
										170		0.619711	0.25782							170	0.381433	0.40603
										171		0.861612	0.150199							171	0.307308	0.827269
										172		0.352837	0.284724							172	0.738892	0.425285
										173		0.198508	0.476297							173	0.457536	0.461239
										174		0.239058	0.316447							174	0.55715	0.532951
										175		0.685387	0.275774							175	0.655671	0.245851
										176		0.22582	0.373573							176	0.387684	0.30334
										177		0.584751	0.507384							177	0.422867	1.01404
										178		0.387832	0.477499							178	0.455811	0.600403
										179		0.388449	0.417223							179	0.625549	1.00045
										180		0.498321	0.171834							180	0.643782	1.48759
										181		0.63222	0.41199							181	0.962499	0.634908
										182		0.611522	0.5635							182	0.703053	0.585024
										183		0.545975	0.651809							183	0.598273	0.947232
										184		0.451183	0.401028							184	0.594157	1.02562
										185		0.261068	0.466173							185	0.679876	0.836807
										186		0.310051	0.17115							186	0.530649	0.390983
										187		0.211761	0.332935							187	0.530172	1.07756
										188		0.170216	0.292755							188	1.12411	0.457073
										189		0.307572	0.294922							189	1.06123	0.341079
										190		0.315773	0.248326							190	0.434335	0.250659
										191		0.445663	0.252317							191	0.745597	1.62111
										192		0.26509	0.176711							192	1.69422	0.358836
										193		0.315311	0.281947							193	1.45377	0.403292
										194		0.238855	0.477109							194	0.59207	0.293197
										195		0.321047	0.215406							195	0.527487	0.301444
										196		0.317636	0.211566							196	0.476938	0.681355
										197		0.175742	0.233291							197	0.819785	2.25153
										198		0.23876	0.224365							198	0.896797	0.555145
										199		0.175135	0.540742							199	5.36396	0.616477
										200		0.216022	0.241396							200	2.19205	0.322015
										201		0.172084	0.104577							201	3.49411	0.427098
										202		0.246349	0.276388							202	1.79556	0.401771
										203		0.12598	0.366511							203	2.66537	0.808234
										204		0.236827	0.33918							204	1.77201	0.559203
										205		0.151996	0.473598							205	0.760954	0.452826
										206		0.198653								206	0.416194	0.424548
										207		0.0945421								207	0.494994	0.43202
										208		0.177475								208	0.702709	0.287198
										209		0.1708								209	0.717261	0.530116
										210		0.321866								210	0.743227	0.819362
										211		0.412837								211	1.11634	0.710152
										212		0.2242								212	1.43367	1.24164
										213		0.420969								213	1.46674	1.03302
										214		0.423251								214	2.26604	0.789276
										215		0.237721								215	1.87291	0.78205
										216		0.158781								216	1.55038	1.10034
										217		0.345407								217	1.67376	0.809448
										218		0.333756								218	1.9032	0.973731
										219		0.269398								219	1.64261	1.11682
										220		0.22003								220	0.47682	0.559673
										221		0.217242								221	0.991746	0.83029
										222		0.189117								222	0.692786	1.2032
										223		0.161942								223	0.980806	0.819274
										224		0.241632								224	0.831648	0.786136
										225		0.151298								225	0.811998	0.447194
										226		0.0908724								226	1.15358	1.22321
										227		0.427133								227	1.81243	0.21789
										228		0.290602								228	0.623667	0.419893
										229		0.216573								229	0.539136	0.207855
										230		0.173483								230	2.48085	0.391099
										231		0.144792								231	0.788495	0.395885
										232		0.320364								232	0.556638	1.75335
										233		0.227082								233	0.531902	0.297519
										234		0.178314								234	0.54939	0.577017
										235		0.176423								235	0.600336	2.24694
										236		0.140256								236	0.650081	0.509131
										237		0.166121								237	0.783763	1.73608
										238		0.221352								238	0.475679	0.536188
										239		0.188238								239	0.446097	0.468213
										240		0.125964								240	0.61838	0.768356
										241		0.570202								241	1.00645	0.310069
										242		0.28425								242	0.745505	0.503643
										243		0.155262								243	1.02422	0.117031
										244		0.138428								244	0.63608	1.13648
										245		0.205428								245	0.485624	0.691803
										246		0.221783								246	0.611339	0.547812
										247		0.14908								247	2.90623	0.657808
										248		0.356291								248	0.621751	0.497334
																				249	0.67563	0.426884
																				250	0.782794	0.365231
										Av	0.999999	0.406692	0.57761							251	0.822899	1.18685
										SD	1.03716	0.22962	0.371318							252	0.677954	0.629441
										SEM	0.086732	0.0145809	0.0259339							253	0.691655	1.48203
										T test		3.08728e-10	6.25639e-06							254	0.832272	0.488098
																				255	0.83429	0.986943
																				256	3.55966	0.55567
																				257	0.514787	0.410621
																				258	0.337565	1.38178
																				259	1.02309	0.273735
																				260	1.57433	0.502865
Fig 6P, Dividing NBs and daughters in esc rescues																				261	0.445414	0.640811
																				262	0.930063	0.421896
		NBs						GMCs												263	0.734448	0.383927
Case Nr	Control	esc-/-	esc-/-, UAS-Double	esc-/-, UAS Tetra		Case Nr	control	esc-/-	esc-/-, UAS-Double	esc-/-, UAS Tetra										264	0.346789	0.497672
1	23	11	30	24		1	32	27	29	43										265	0.590051	0.334478
2	19	13	32	23		2	41	28	50	50										266	0.873342	0.45882
3	24	14	19	23		3	39	23	34	50										267	1.74352	0.455221
4	29	10	19	17		4	32	27	31	24										268	0.494975	0.38488
5	20	11	18	16		5	41	27	31	37										269	0.554731	0.324819
6	32	17	22	16		6	55	35	48	28										270	0.630382	0.354979
7	22	22	16	16		7	49	22	39	42										271	0.384662	0.387464
8	28	17	30	35		8	47	27	43	52										272	0.664903	0.230178
9	16	17	30	29		9	27	28	59	46										273	0.570221	0.163025
10	32	19		14		10	35	34		35										274	0.52689	0.321607
11	24					11	31													275	0.480162	1.42057
Av	24.4545	15.1	24	21.3		Av	39	27.8	40.4444	40.7										276	0.543416	0.626575
SD	5.26049	3.92853	6.38357	6.79951		SD	8.66025	4.07704	10.3212	9.55743										277	0.432877	0.5743
SEM	1.5861	1.24231	2.12786	2.15019		SEM	2.61116	1.28927	3.44041	3.02232										278	0.556572	0.363698
T test		0.000192708	0.866223	0.254055		T test		0.00167686	0.742479	0.675345										279	0.33097	0.233431
																				280	1.96831	0.421263
																				281	0.433206	0.288556
																				282	0.498636	0.252007
																				283	0.328042	0.541234
																				284	0.692908	0.380859
																				285	0.384292	0.299309
																				286	0.750758	0.577839
																				287	0.412341	0.790796
																				288	0.916886	0.604913
																				289	0.519142	0.606572
																				290	0.678585	0.315771
																				291	1.80931	0.30232
																				292	0.472294	0.854378
																				293	0.637737	0.27071
																				294	0.363504	0.446324
																				295	0.222192	0.38663
																				296	0.521335	0.652433
																				297	0.766631	0.309767
																				298	0.329503	0.439677
																				299	0.464172	1.23868
																				300	0.537438	0.377187
																				301	0.612611	0.275541
																				302	0.526203	0.834867
																				303	0.30597	0.364008
																				304	0.185913	0.334891
																				305	1.85715	0.323017
																				306	1.7743	0.25746
																				307	1.50899	1.05476
																				308	1.78395	0.389522
																				309	2.16493	0.642837
																				310	1.29045	1.67656
																				311	4.05483	2.12309
																				312	3.54747	1.14798
																				313	4.6937	0.823807
																				314	1.40396	1.55834
																				315	1.02167	0.525462
																				316	1.99849	2.08187
																				317	1.40481	0.413066
																				318	1.56775	0.4135
																				319	1.18509	0.584498
																				320	1.89849	0.749702
																				321	1.24337	0.361656
																				322	2.57525	0.310188
																				323	2.47645	0.5421
																				324	1.50702	1.2784
																				325	0.515332	0.940773
																				326	1.81252	0.289436
																				327	1.07227	1.21492
																				328	0.683423	0.253027
																				329	1.34879	0.344219
																				330	1.02132	0.242024
																				331	1.08486	0.202126
																				332	1.30714	0.412824
																				333	0.882514	0.754275
																				334	3.30831	0.432036
																				335	0.400089	0.170514
																				336	2.28081	0.282115
																				337	2.45092	0.244529
																				338	1.02464	0.297651
																				339	2.02863	0.242599
																				340	1.61171	0.429024
																				341	0.819763	0.315751
																				342	0.570351	0.217539
																				343	0.38302	0.585224
																				344	0.565782	0.393101
																				345	0.708732	0.439669
																				346	0.942265	0.395811
																				347	0.851118	0.36796
																				348	0.492868	0.269229
																				349	0.877031	0.326023
																				350	0.225473	0.280453
																				351	0.194082	0.617307
																				352	0.683425	0.711653
																				353	0.478036	0.415782
																				354	0.319114	0.485775
																				355	0.947233	0.580176
																				356	0.232384	0.393306
																				357	0.53712	0.506359
																				358	0.35855	0.299458
																				359	0.381171	0.371041
																				360	0.603234	0.569921
																				361	0.714654	0.272817
																				362	1.04751	0.667001
																				363	0.507382	0.444188
																				364	2.89612	0.562763
																				365	2.55274	0.832417
																				366	1.3491	0.439158
																				367	1.42852	0.541052
																				368	0.498093	0.447052
																				369	0.97893	0.341423
																				370	0.62653	0.327639
																				371	0.301741	0.204233
																				372	0.382352	0.528946
																				373	0.997527	0.746329
																				374	0.489942	1.15391
																				375	0.782188	0.935369
																				376	0.518758	0.465416
																				377	1.21581	0.512876
																				378	0.436966	0.465925
																				379	0.719798	0.412455
																				380	0.393015	0.376449
																				381	0.462209	0.213175
																				382	0.325066	0.403531
																				383	0.689349	0.363719
																				384	0.76082	0.301906
																				385	0.582811	0.271016
																				386	0.422862	1.45339
																				387	0.354768	0.391944
																				388	0.62476	0.645186
																				389	0.502475	0.520406
																				390	0.487316	0.54537
																				391	0.833541	0.23365
																				392	1.02352	0.511743
																				393	0.60824	0.621618
																				394	0.74644	0.73733
																				395	0.54817	0.440331
																				396	0.477482	0.459031
																				397	0.478601	0.329378
																				398	0.366151	0.316505
																				399	0.507723	0.3868
																				400	0.546752	0.222746
																				401	0.644882	0.277228
																				402	0.720103	0.213017
																				403	0.490657	1.44338
																				404	0.292782	0.414981
																				405	0.351756	1.61753
																				406	0.900196	1.38106
																				407	0.670483	0.909857
																				408	0.281974	0.421212
																				409	0.474103	1.21311
																				410	0.490982	1.13415
																				411	0.279439	1.13648
																				412	0.232354	1.10234
																				413	0.341098	1.43506
																				414	2.97872	1.10938
																				415	3.65801	1.86007
																				416	2.67239	0.316443
																				417	2.87371	1.16717
																				418	2.40694	1.21309
																				419	2.0719	1.15097
																				420	2.00741	1.27743
																				421	2.36558	0.651689
																				422	2.18398	1.28911
																				423	1.64026	0.738099
																				424	2.14973	0.501758
																				425	2.35909	0.427291
																				426	1.99468	1.3495
																				427	1.80928	2.06372
																				428	0.780319	1.15009
																				429	0.717558	0.479629
																				430	0.537462	0.420625
																				431	0.962332	0.319982
																				432	1.48659	0.385148
																				433	1.0739	0.449519
																				434	1.41308	0.421246
																				435	1.27303	0.787335
																				436	0.555234	0.171738
																				437	0.860639	0.330589
																				438	1.06425	0.294706
																				439	0.887535	0.357506
																				440	0.827981	0.55504
																				441	0.770682	0.503712
																				442	0.852656	0.460526
																				443	0.622621	0.545812
																				444	0.582744	0.218104
																				445	0.613155	0.514253
																				446	0.820978	0.292072
																				447	1.02668	0.819167
																				448	0.577525	0.450168
																				449	0.770033	0.651157
																				450	0.378664	0.253824
																				451	2.056	0.535898
																				452	0.968307	0.323745
																				453	0.828587	0.808217
																				454	0.716835	0.620521
																				455	2.89953	0.572009
																				456	0.647557	0.588842
																				457	0.874041	0.524804
																				458	0.492615	0.651722
																				459	1.03609	0.337609
																				460	0.86347	0.531697
																				461	0.761437	0.511003
																				462	0.725578	0.791807
																				463	0.634295	0.515107
																				464	0.789532	0.478706
																				465	0.604051	0.630476
																				466	0.689351	0.651416
																				467	0.625344	0.621646
																				468	0.382177	0.670234
																				469	0.700565	0.421451
																				470	0.698272	0.526382
																				471	0.497569	0.779169
																				472	0.50452	0.641281
																				473	0.432508	0.341494
																				474	0.580864	0.234118
																				475	0.535347	0.690299
																				476	0.631291	0.430581
																				477	1.73454	0.401826
																				478	0.784671	0.465051
																				479	0.625962	0.182833
																				480	0.340768	0.527172
																				481	0.349172	0.57415
																				482	0.598926	0.481284
																				483	0.609832	0.314656
																				484	0.482111	0.245216
																				485	1.44708	1.20225
																				486	0.581467	0.476207
																				487	0.507304	0.317783
																				488	0.585558	0.554085
																				489	0.783103	0.537152
																				490	0.71282	0.766194
																				491	0.566991	0.903853
																				492	0.550347	1.36594
																				493	0.505132	0.310985
																				494	0.673315	1.69652
																				495	0.411795	0.650441
																				496	0.231746	0.702685
																				497	0.545233	0.666261
																				498	0.835381	0.777339
																				499	1.02239	1.43426
																				500	0.522394	0.551123
																				501	0.604808	0.553044
																				502	0.682364	0.476598
																				503	0.618158	0.298523
																				504	0.465329	0.41763
																				505	0.616835	0.406436
																				506	1.70875	0.492328
																				507	0.361356	0.505889
																				508	0.699062	0.400375
																				509	0.512825	0.376049
																				510	0.541895	0.221833
																				511	0.783408	0.272832
																				512	0.732079	0.240242
																				513	0.705412	0.379439
																				514	0.50748	0.313413
																				515	0.383307	0.232811
																				516	0.495172	0.294372
																				517	1.64639	0.506101
																				518	0.351848	1.0815
																				519	0.393684	0.460187
																				520	0.393684	0.845269
																				521	0.396318	1.20534
																				522	0.351975	1.00794
																				523	2.82308	1.84901
																				524	2.03887	1.38521
																				525	5.18546	0.640757
																				526	2.1656	1.36883
																				527	1.84233	0.676151
																				528	1.74309	0.744435
																				529	1.85253	0.470373
																				530	1.37763	0.860508
																				531	1.48303	0.531037
																				532	4.98475	0.633554
																				533	2.05739	0.826993
																				534	1.67376	0.648363
																				535	2.04475	0.914701
																				536	1.65143	0.639118
																				537	1.92287	0.788943
																				538	1.48896	1.95017
																				539	1.57387	1.13643
																				540	0.698946	0.759885
																				541	1.06799	0.68904
																				542	2.22659	0.818939
																				543	0.763322	0.645663
																				544	0.750685	0.905478
																				545	0.506978	0.554564
																				546	1.15796	0.553498
																				547	0.344933	0.613354
																				548	0.336992	1.01797
																				549	0.600924	1.42723
																				550	0.66683	0.446785
																				551	0.53055	0.365468
																				552	0.718382	0.47385
																				553	0.292373	0.353089
																				554	0.970935	0.923079
																				555	1.18245	0.625758
																				556	0.538066	1.4248
																				557	0.736889	0.721267
																				558	0.516431	1.93664
																				559	0.690021	0.407774
																				560	0.454684	0.53029
																				561	0.596612	0.494666
																				562	0.470351	0.583977
																				563	0.676066	0.611513
																				564	0.805613	0.485745
																				565	0.6487	0.328583
																				566	1.48417	0.423344
																				567	1.19522	0.416711
																				568	1.27608	0.568336
																				569	0.793787	0.449101
																				570	0.607529	1.61761
																				571	0.47353	1.26252
																				572	1.2778	0.380377
																				573	0.846299	0.59242
																				574	0.664842	0.41471
																				575	0.675796	0.381443
																				576	0.335383	0.279908
																				577	0.580539	0.601948
																				578	0.96464	0.471002
																				579	0.490535	0.729241
																				580	0.522439	0.361822
																				581	0.57371	0.821937
																				582	0.604307	0.707702
																				583	0.328648	0.412657
																				584	0.398863	0.396411
																				585	0.468212	0.410164
																				586	0.580229	0.449539
																				587	0.566956	0.418793
																				588	0.757126	0.565754
																				589	0.628685	0.365989
																				590	0.512342	0.48121
																				591	0.53997	0.408817
																				592	0.741402	0.582751
																				593	0.474205	0.30925
																				594	0.816568	0.616214
																				595	0.495279	0.246414
																				596	1.10089	0.394941
																				597	0.444655	0.344536
																				598	0.683245	0.37154
																				599	2.75214	0.401266
																				600	2.73636	0.265825
																				601	0.61005	0.357669
																				602	0.679613	0.735501
																				603	0.382997	0.542545
																				604	0.757908	0.34617
																				605	0.430954	0.521283
																				606	1.36265	0.493484
																				607	0.523195	0.385949
																				608	0.755803	0.593858
																				609	0.507582	0.779547
																				610	0.719078	0.349141
																				611	0.773237	0.785325
																				612	1.03694	0.288903
																				613	1.22688	0.334547
																				614	1.13992	0.487052
																				615	0.494132	0.479132
																				616	0.458134	0.254985
																				617	1.13582	0.291939
																				618	0.359801	0.42591
																				619	0.495831	0.562069
																				620	0.474003	0.566
																				621		0.748765
																				622		0.548998
																				Av	1	0.632234
																				SD	0.740565	0.410194
																				SEM	0.0297418	0.0164473
																				T test		6.34055e-25

## Sheet: Figure S1
	AFT VNC PH3 cells
	Case Nr	Control	elav>hbn	elav>ey	elav>toy	elav>bsh	elav>oc	elav>Rx	elav>otp	elav>erm	elav>tll	elav>Doc1	elav>Doc2	elav>Doc3			P-values
	1	0	1	2	1	4	3	3	20	26	8	3	27	5		0.05	0.01	0.001
	2	0	3	3	1	4	0	1	30	19	5	5	20	6		*	**	***
	3	0	2	1	1	10	2	4	19	21	4	1	21	4
	4	0	1	2	1	5	0	4	24	31	9	1	36	2
	5	0	1	2	2	2		6	11	43	9	1	50	2
	6	0	2	1	1	1		5	18	26	11	1	33	12
	7	0		4		2		1	21		9	2		6
	8	0		1		4		3	18		6
	9	0		2		3		4	13		5
	10	0		0		4		7			9
	Av	0	1.66667	1.8	1.16667	3.9	1.25	3.8	19.3333	27.6667	7.5	2	31.1667	5.28571
	SD	0	0.816497	1.13529	0.408248	2.46982	1.5	1.93218	5.61249	8.61781	2.3214	1.52753	11.1967	3.40168
	SEM	0	0.333333	0.359011	0.166667	0.781025	0.75	0.61101	1.87083	3.51821	0.734091	0.57735	4.57104	1.28571
	T test bsh-otp		1.19957e-05
	t test bsh-tll		0.00351215
	t test bsh-Doc2		0.00166315
	T test bsh-erm		0.000831421

## Sheet: Figure S2-S3
	Figure S2. Brain NBs expressing TFs
	Inmunostaining											P-values
	tllgfp erm Z R Dpn A Rx C st 15	Dpn+ B1 B2	Tll tot	Erm tot	Hbn tot	Erm, tll	Hbn, Tll	Hbn, Tll, Erm			0.05	0.01	0.001
	Case										*	**	***
	1	81	81	4	13	4	13	3
	2	108	108	4	21	4	18	2
	3	109	109	4	16	4	16	2
	4	112	112	6	17	6	17	4
	5	118	118	4	17	4	17	2
	6	120	120	6	21	6	21	4
	7	105	105	4	23	4	23	4
	8	110	110	4	16	4	16	0
	9	114	114	7	13	7	13	2
	average	108.556	108.556	4.77778	17.4444	4.77778	17.1111	2.55556
	Percentage	1	1	4.40123	16.0696	4.40123	15.7625	2.35415
	SD	11.381	11.381	1.20185	3.53946	1.20185	3.29562	1.33333
	SEM	3.79368	3.79368	0.400617	1.17982	0.400617	1.09854	0.444444
	Inmunostaining
									PERCENTAGE OF NEUROBLASTS EXPRESSING
	anti Doc2 F anti ermZ R Dpn A Rx Cy st 15							Tll	Erm	Doc2	Hbn	Tll, Erm	Tll, Hbn	Tll, Erm, Hbn	Doc2, Erm
	Case		Doc2	Doc2, Erm	Doc2, Rx			1	0.04	0.07	0.16	0.04	0.16	0.03	0.01
	1		13	2	0
	2		2	2	0
	3		8	2	0
	4		10	0	0
	5		8	0	0
	6		8	1	0
	7		8	1	0
	Av		8.14286	1.14286	0
	Percentage		7.5011	1.05279
	SD		3.28778	0.899735	0
	SEM		1.24267	0.340068	0

## Sheet: Figure S4
		Fig S4C										Fig S4D										P-values
		NB PH3 Edu/ NB Edu					GMC PH3 Edu/ NB Edu					GMC EdU					NB EdU				0.05	0.01	0.001
	Case nr	Control	pros>erm, tll	pros>Tetra		Case nr	Control	pros>erm, tll	pros>Tetra		Case nr	Control	pros>erm, tll	pros>Tetra		Case nr	Control	pros>erm, tll	pros>Tetra		*	**	***
	1	17.6471	31.25	14.2857		1	4.10959	13.8889	7.04225		1	73	72	71		1	51	48	42
	2	13.0435	12.766	10		2	4.54545	20.2381	22.7273		2	44	84	66		2	23	47	40
	3	6.66667	0	24.0741		3	4.54545	0	13.9241		3	44	49	79		3	30	37	54
	4	12.5	18.3673	15.3846		4	27.7778	18.8406	15		4	18	69	80		4	16	49	52
	5	18.75	15.3846	18.75		5	14.2857	20	27.7108		5	49	90	83		5	48	65	64
	6	12.5	13.2353	7.31707		6	22.9167	12.987	4.10959		6	48	77	73		6	40	68	41
	7	8.82353	10.4478	13.5135		7	15.5556	10.6667	3.22581		7	45	75	62		7	34	67	37
	8	14	11.8644	2		8	15.2542	18.4211	1.11111		8	59	76	90		8	50	59	50
	9	23.3333	13.2075	11.5385		9	22.449	24.0385	3.2967		9	49	104	91		9	30	53	52
	10	16	17.9487	0		10	14.5161	24	1.81818		10	62	50	55		10	50	39	42
	Av	14.3264	14.4472	11.6863		Av	14.5956	16.3081	9.99658		Av	49.1	74.6	75		Av	37.2	53.2	47.4
	SD	4.85224	7.80357	7.29898		SD	8.28728	7.25365	9.40614		SD	14.4257	16.6547	11.8134		SD	12.506	11.2032	8.36926
	SEM	1.53441	2.4677	2.30814		SEM	2.62067	2.29381	2.97448		SEM	4.5618	5.26667	3.73571		SEM	3.95474	3.54275	2.64659
	T test		0.967398	0.355304		T test		0.628965	0.261399		T test		0.0018426	0.000381291		T test		0.00753727	0.0480836

## Sheet: Figure S5
Fig S5 I, Fluorescence intensity in single NBs, normalized by each control average expression. 3 embryos/genotype
	OrR CycE mitotic	Df otp, Rx, hbn CycE mitotic	OrR CycE no mitotic	Df otp, Rx, hbn CycE no mitotic																P-values
AV	1	0.90659	1	0.769166				OrR Stg mitotic	Df otp, Rx, hbn Stg mitotic	OrR Stg no mitotic	Df otp, Rx, hbn Stg no mitotic				OrR E2F mitotic	Df otp, Rx, hbn E2F mitotic	OrR E2F no mitotic	Df otp, Rx, hbn E2F no mitotic	0.05	0.01	0.001		OrR Dap mitotic	Df otp, Rx, hbn Dap mitotic	OrR Dap no mitotic	Df otp, Rx, hbn Dap no mitotic				OrR CycE mitotic	Df erm CycE mitotic	OrR CycE no mitotic	Df erm CycE no mitotic				OrR Stg mitotic	Df erm Stg mitotic	OrR Stg no mitotic	Df erm Stg no mitotic				OrR E2F mitotic	Df erm E2F mitotic	OrR E2F no mitotic	Df erm E2F no mitotic
SD	0.46457	0.380516	0.642351	0.462103			AV	1	0.814369	1	0.881468			AV	1	1.10548	1	1.291	*	**	***		1	0.879043	1	0.914901			AV	1	0.733502	1	0.629335			AV	1	1.16056	1	1.12018			AV	1	0.821804	0.999998	0.896562
SEM	0.0644243	0.0517816	0.0435055	0.0340667			SD	0.574487	0.38148	0.565804	0.46532			SD	0.394836	0.48666	0.810282	0.781409					0.946805	0.688652	0.760601	0.890119			SD	0.461144	0.380489	0.775389	0.465409			SD	0.549114	0.514946	0.430248	0.49045			SD	0.501664	0.428993	0.773262	0.723186
T		0.261155		3.63849e-05			SEM	0.0701848	0.0496645	0.0333984	0.0318086			SEM	0.0552881	0.059455	0.0457999	0.0551164				SEM	0.133898	0.0983788	0.0590341	0.0630989			SEM	0.0567629	0.0532791	0.0472763	0.0267813			SEM	0.0665898	0.0694353	0.0299043	0.0293625			SEM	0.0647646	0.0563295	0.0465449	0.0426141
Count	Normalized fluorescence	Normalized fluorescence	Normalized fluorescence	Normalized fluorescence			T -test		0.0329129		0.0104625			T -test		0.196462		5.79612e-05				T -test		0.468523		0.325356			T -test		0.000859357		3.07487e-11			T -test		0.0977761		0.00432403			T -test		0.0401301		0.101763
1	1.52758	1.05123	0.77859	0.627681			Count	Normalized fluorescence	Normalized fluorescence	Normalized fluorescence	Normalized fluorescence			Count	Normalized fluorescence	Normalized fluorescence	Normalized fluorescence	Normalized fluorescence				Count	Normalized fluorescence	Normalized fluorescence	Normalized fluorescence	Normalized fluorescence			Count	Normalized fluorescence	Normalized fluorescence	Normalized fluorescence	Normalized fluorescence			Count	Normalized fluorescence	Normalized fluorescence	Normalized fluorescence	Normalized fluorescence			Count	Normalized fluorescence	Normalized fluorescence	Normalized fluorescence	Normalized fluorescence
2	0.848638	0.948042	0.47958	0.828033			1	1.8499	0.679817	5.0347	0.951149			1	1.21403	2.1849	5.76174	1.90328				1	0.334263	1.50894	2.01686	1.07038			1	0.667508	1.04232	1.90121	1.62946			1	1.28883	2.89927	2.53712	3.74641			1	2.25453	0.500184	0.733143	0.43491
3	0.751676	0.281507	0.296947	0.243395			2	0.490706	1.26493	1.50932	2.73192			2	0.871767	1.72714	2.22155	0.949975				2	0.234921	0.320861	0.545435	1.03817			2	0.961442	0.357623	1.43073	0.52939			2	0.765245	0.747925	2.77595	0.906413			2	1.54585	0.379601	0.636409	0.312409
4	0.869349	1.68112	0.396115	0.964048			3	0.673325	0.950945	1.9199	0.722775			3	0.78559	1.31643	1.24899	0.597906				3	0.236745	0.765186	1.90675	1.25126			3	1.55529	0.725254	0.654843	1.10233			3	0.634282	2.32529	1.35871	1.83892			3	1.63343	1.08768	0.999781	0.638306
5	0.501609	1.37692	0.492776	1.9095			4	0.794228	1.23813	0.732341	0.647671			4	1.27608	0.607458	3.98359	0.757078				4	0.340403	0.356122	0.655603	0.464263			4	0.410161	0.967876	0.451152	0.794977			4	0.771046	1.28956	1.17036	0.78067			4	1.54626	0.490651	0.330396	0.434053
6	0.775751	1.16609	0.427584	0.360432			5	0.633741	1.21753	0.908966	0.56605			5	0.880287	0.486378	1.27751	2.76952				5	2.21768	0.99268	0.995421	0.356017			5	0.502949	0.763418	1.23863	0.487959			5	2.69276	1.20219	0.807835	1.30297			5	1.41819	0.232811	1.57101	0.222482
7	0.770351	1.06432	0.627466	0.227422			6	2.56209	1.03346	1.2076	1.23075			6	0.37915	0.982262	0.318128	1.45793				6	1.69985	0.467195	1.10463	0.951049			6	0.881894	0.611961	0.871101	0.980598			6	0.381402	1.18686	0.79957	1.11806			6	1.01186	0.936491	0.52153	0.281606
8	0.319597	1.76924	0.824345	0.21183			7	0.661975	1.16762	1.77244	0.439284			7	1.29679	1.1576	0.452427	1.63467				7	1.76747	0.269057	1.06725	1.3355			7	0.645101	1.49498	0.345632	0.235046			7	3.15736	1.33329	1.10962	1.39771			7	1.95529	0.449971	1.28219	0.660107
9	0.780931	1.05619	0.74947	0.328341			8	0.589749	1.25025	0.725282	0.541992			8	1.84071	0.664304	1.40868	1.82532				8	1.05417	2.17831	0.49725	0.93431			8	0.662656	0.548191	1.35094	0.327795			8	2.01272	1.29634	0.72109	1.52764			8	1.01783	1.22128	1.45573	1.46753
10	0.457593	0.623114	1.16917	0.536561			9	0.670257	0.989579	0.494685	0.886041			9	1.08667	1.27844	0.828271	3.57952				9	4.92397	0.263854	0.26792	0.55499			9	0.294388	1.15117	1.35172	0.309191			9	1.21118	0.961434	1.69128	0.650744			9	1.26128	1.72987	0.645167	0.929072
11	0.603189	1.21061	0.759991	0.536561			10	1.94379	0.316192	1.47906	0.545458			10	0.736523	0.757173	0.841249	0.863219				10	0.585496	2.3764	0.541566	0.466587			10	2.43895	0.902234	0.293877	3.4152			10	1.05547	1.41626	1.38985	0.614605			10	1.24106	0.805233	0.52183	0.187559
12	0.569233	1.45914	0.589535	0.536561			11	0.679982	0.5293	0.805211	0.699113			11	0.534716	0.81451	1.43279	1.83245				11	0.528347	0.386038	0.782764	0.989167			11	1.2571	0.302136	1.32794	0.586224			11	1.46007	1.16373	0.542657	1.59577			11	0.629008	1.48476	1.18069	0.9663
13	1.02517	0.777532	1.14053	0.300184			12	1.3139	1.12837	1.72815	1.50158			12	1.07667	0.810025	0.749395	1.89138				12	0.641048	1.13222	0.963278	0.42575			12	1.01106	0.607766	1.36076	1.07252			12	1.50201	0.96789	1.72379	0.482492			12	1.17255	0.394549	0.465422	0.212714
14	1.06826	0.904247	0.438479	0.553703			13	1.11782	0.658992	1.05826	1.64363			13	0.90291	0.947659	2.83962	1.00382				13	0.671507	2.74234	0.58142	0.475779			13	0.518178	0.0831947	1.26431	0.753078			13	1.63248	0.643847	1.05385	0.683767			13	0.875773	0.505815	1.38554	0.707238
15	1.95072	0.711579	1.47165	0.640979			14	2.02554	0.271156	2.79452	0.881889			14	1.04568	0.730139	0.459675	1.96337				14	0.821051	0.2681	0.845628	0.289427			14	1.65332	0.742873	0.256592	0.500929			14	1.00267	1.31314	0.906464	0.490067			14	0.305187	0.543826	0.641218	0.452514
16	1.2478	1.24152	0.84723	0.6021			15	0.98936	1.36171	1.15963	0.703709			15	1.01466	0.925796	0.86902	1.70393				15	0.599915	0.295566	0.938701	0.788116			15	0.968936	1.48506	1.31777	0.212878			15	1.10967	0.592653	1.21612	0.96312			15	2.6098	0.415614	1.14567	0.398329
17	0.43791	0.488127	1.47086	0.939371			16	1.11484	0.675	2.14825	0.819504			16	0.443066	1.0398	0.607135	1.69206				16	0.261174	0.579067	0.629	0.528043			16	1.14249	0.425639	0.532819	0.614027			16	1.49647	2.09969	1.00631	1.55364			16	0.690228	0.509628	0.911953	0.412231
18	0.929583	0.699755	0.372016	1.1479			17	0.529016	0.72136	1.08	0.629548			17	0.33265	1.06031	0.619897	1.07325				17	0.443025	0.411385	1.54624	1.04812			17	0.867837	0.784575	0.882053	0.30146			17	1.0551	0.56437	0.946717	2.01477			17	1.34151	0.970639	0.550438	1.17054
19	1.0601	0.858465	1.37035	0.278097			18	2.12591	0.621074	0.774701	0.379033			18	1.11459	1.62224	0.4658	1.44653				18	0.563976	1.75562	1.5158	0.37991			18	1.47338	0.629235	0.647431	0.45523			18	1.47862	2.17112	1.12188	1.20911			18	0.942285	0.621449	1.34621	0.932989
20	0.808699	0.563864	1.10275	0.538974			19	0.502287	0.548074	0.86667	1.16471			19	0.441089	0.96504	1.82289	1.26397				19	0.824893	1.59098	1.11672	0.500199			19	0.496656	0.82116	0.534676	0.402038			19	1.58288	0.857358	0.911585	1.58115			19	1.11851	0.406921	0.37366	0.710287
21	1.82643	1.1967	1.34554	0.480529			20	1.02346	0.604083	0.314972	1.25834			20	1.7538	0.818573	1.19989	1.14644				20	2.93865	1.07149	0.766245	2.56391			20	0.396734	0.538836	0.844471	0.891957			20	1.86476	0.847275	0.556371	0.658467			20	0.930076	0.994411	0.327976	0.172802
22	1.09604	1.15655	1.35589	0.407553			21	1.34276	1.668	1.05531	0.625217			21	1.52449	1.29247	0.393411	1.0416				21	0.691424	0.371676	1.36147	0.52102			21	0.569399	0.566645	0.767457	0.598193			21	1.09565	0.936393	1.0514	1.41597			21	1.0829	0.856177	0.972935	0.817492
23	0.582241	0.931757	1.2798	0.790524			22	1.31561	1.22417	0.575747	0.755731			22	1.16368	1.1872	0.484464	0.403556				22	0.62421	0.345835	0.761884	0.487842			22	0.636531	1.36055	0.564865	0.490697			22	0.554423	0.710857	1.71193	1.55061			22	0.651599	0.403092	1.40834	0.598249
24	1.32028	1.03569	1.34957	0.775025			23	0.734933	0.653029	0.815413	0.369299			23	1.16326	0.646797	0.349691	0.298303				23	1.66803	1.03793	1.08785	0.644262			23	0.76066	1.04031	0.610042	0.670066			23	0.573216	1.17283	0.889998	1.4154			23	0.668636	0.658834	0.355571	1.11165
25	0.385151	1.42606	1.16711	0.986159			24	0.488675	1.12746	0.400724	0.300929			24	1.10254	1.08656	1.42805	1.63368				24	0.431329	1.64618	3.34517	0.523168			24	0.931346	0.347799	0.406392	0.544293			24	0.521945	1.42114	0.846037	0.775552			24	0.666511	1.60523	1.1937	0.522376
26	0.609268	1.59685	1.46125	1.13047			25	1.27784	0.821657	0.560887	0.750757			25	1.40906	1.53385	1.10661	1.79918				25	0.479724	0.415579	0.855957	0.613862			25	0.747417	0.516374	0.962337	0.533038			25	1.21671	1.73459	0.554243	1.17537			25	0.317872	0.143482	0.552198	0.774558
27	1.11563	1.11744	1.3809	1.70018			26	2.32139	1.07989	1.09397	0.907892			26	1.03541	1.00083	0.919302	1.71943				26	0.530352	0.620128	0.96002	0.546239			26	1.12332	0.811814	1.08614	0.461313			26	0.717595	0.836837	0.567394	1.05133			26	0.822245	0.238048	1.91456	0.459909
28	0.904181	1.10946	1.2597	3.31854			27	0.257894	0.78345	1.73541	0.643077			27	1.12194	1.48946	0.708191	0.771771				27	3.86764	0.809049	1.1544	0.568554			27	1.10201	1.12164	0.452995	0.382247			27	0.616917	0.966607	0.861839	1.45046			27	0.42038	1.88147	1.15881	0.664831
29	0.787055	0.906164	1.14682	1.32745			28	0.804197	0.838274	1.41552	0.246928			28	1.83991	1.42116	0.631718	2.69202				28	0.845285	2.32121	1.29695	1.38532			28	1.05429	0.435524	0.894585	0.54088			28	0.420624	0.799942	1.51149	0.945415			28	0.622707	1.12119	0.354368	0.420319
30	0.119275	0.444368	4.37618	0.50448			29	0.818747	0.35319	1.09529	0.591175			29	1.60173	1.06089	1.09115	1.14693				29	1.4375	2.56694	2.45515	0.658646			29	0.496401	0.895942	1.34367	0.811047			29	0.303797	0.836719	1.04539	0.783931			29	0.558091	0.989095	0.771765	0.888242
31	0.564318	0.958619	1.69735	1.19304			30	0.59276	1.8067	1.43915	0.99684			30	0.740058	1.41252	1.38258	1.45973				30	1.19637	0.590867	1.2371	1.10355			30	0.733601	0.781001	0.661876	0.647615			30	0.564241	0.662044	0.770723	0.541829			30	1.3733	1.10841	1.42117	0.54772
32	1.30795	0.571828	0.452321	0.926878			31	0.670835	1.2545	0.622663	1.0945			31	0.822408	0.687422	1.54884	1.0026				31	0.510603	0.568292	1.72233	1.6412			31	0.739475	0.46032	0.873465	0.295332			31	0.723827	1.82638	1.16074	0.330564			31	1.73598	0.53262	0.987993	0.61231
33	2.2882	0.337879	1.74777	0.796132			32	0.858851	1.23324	2.84561	1.5925			32	0.902199	0.766123	2.23506	0.651524				32	0.397633	0.252818	1.41483	1.23234			32	0.228142	0.575971	0.407376	0.776892			32	0.830082	0.936111	0.890647	1.25363			32	0.955783	0.612354	0.951334	0.518761
34	0.531952	0.408872	0.946251	2.03194			33	2.1508	0.469334	1.42622	0.602606			33	1.75534	1.65237	1.59161	1.82601				33	0.44406	0.497069	2.01178	1.40061			33	0.947653	0.346944	2.13276	0.685689			33	0.480477	0.713727	1.34052	1.07499			33	0.774905	0.93552	1.8042	0.236996
35	0.515651	0.287843	0.464152	0.825258			34	0.950557	0.941178	1.20456	0.55909			34	0.600872	1.39231	0.603598	1.06837				34	0.402752	0.602461	1.72797	0.994138			34	1.02865	0.291313	1.28631	0.938913			34	0.445007	0.91751	1.35603	1.7206			34	0.633527	0.692177	1.36842	0.530366
36	1.79832	0.899542	0.483285	1.59144			35	0.727779	0.243419	1.38695	0.332821			35	0.639568	0.805099	1.94838	0.423828				35	0.365869	0.804828	1.35395	1.1537			35	0.718445	0.69747	0.12097	0.297142			35	1.05011	0.703771	1.46476	1.69056			35	0.689289	1.15714	0.814117	0.576931
37	1.0022	0.762832	1.08887	1.07062			36	0.911586	1.05481	0.561743	0.43747			36	0.71293	0.308027	1.31503	1.28106				36	1.77026	0.842424	1.53697	0.535698			36	1.92771	1.17299	0.242245	0.192949			36	1.88575	0.553017	0.258548	1.28567			36	0.943802	0.533202	1.51635	1.89747
38	1.12051	0.826531	0.334334	1.12223			37	0.886697	0.396235	1.74606	1.05814			37	0.902838	0.202082	0.635775	1.21364				37	0.394046	0.405471	0.568798	0.459841			37	1.04196	0.646375	0.43302	0.568129			37	0.919634	0.851716	1.88274	1.12346			37	1.3563	1.81161	0.804938	0.406019
39	1.35604	0.633997	2.40905	1.20901			38	0.233954	0.396235	0.998056	1.42712			38	1.24648	1.2339	0.71801	1.67431				38	0.286571	0.542626	0.923909	0.298201			38	1.24632	0.255316	0.375206	0.411385			38	1.06058	0.798711	1.13803	0.875202			38	0.704968	0.909555	0.544767	0.861394
40	1.87504	0.390765	0.996937	1.26517			39	1.36201	1.00339	1.48248	0.956352			39	1.41261	0.572451	0.971346	0.837617				39	2.22168	0.478114	1.31402	1.49013			39	1.09376	1.82285	0.393593	0.856296			39	1.24303	0.931	0.440093	1.00402			39	1.76754	1.84908	1.11286	1.31545
41	1.38121	0.996053	1.05857	0.979834			40	0.486138	0.870108	0.464542	1.01161			40	0.681302	1.00596	2.52317	1.23345				40	0.540678	0.412238	4.93244	1.09984			40	0.834228	1.48875	0.461005	0.231604			40	0.741889	0.916392	1.31245	0.931			40	0.814316	0.903098	2.09387	1.14802
42	1.6446	0.358011	1.93597	0.781729			41	1.39819	0.600199	0.423512	0.858401			41	0.502687	1.00329	1.70811	2.20882				41	2.1965	1.42951	1.35455	0.55066			41	1.19802	0.670928	0.0855061	0.27903			41	0.962644	1.45111	1.39508	0.559647			41	0.670334	0.914275	0.952952	0.803511
43	1.62328	0.507327	1.48671	0.799902			42	0.569915	0.506112	1.30536	0.951142			42	1.27827	0.844639	0.382531	0.479291				42	0.753214	0.433337	0.864104	0.866899			42	0.90514	0.991402	0.214945	0.250977			42	0.838279	1.89298	1.53976	0.736196			42	0.889874	1.11045	1.62717	1.13575
44	1.38371	0.784126	0.64338	0.881423			43	1.9438	0.311067	0.607245	0.869629			43	1.3413	1.03972	2.87536	0.663268				43	0.61966	0.958316	2.32433	0.935914			43	1.5017	0.343417	0.840359	0.53143			43	0.988615	0.802948	1.37915	1.1936			43	0.955847	0.68294	1.11581	0.265524
45	0.821636	0.434938	0.938402	0.880161			44	0.893032	0.395017	2.65524	1.05083			44	0.843571	1.44822	1.31029	1.31937				44	0.657944	0.718069	1.37283	0.838019			44	1.44726	0.826803	0.53645	0.632984			44	0.7711	1.06928	0.939641	0.634357			44	2.26006	0.646068	0.54264	1.78728
46	0.951129	0.513545	0.548986	0.279317			45	0.342711	0.394421	1.03231	0.953207			45	1.2233	1.44715	0.189925	1.24905				45	0.804791	2.05266	0.701318	0.794925			45	1.14453	0.657831	0.538728	0.265588			45	0.607431	0.706949	1.46739	1.87783			45	0.815004	1.40568	0.576999	0.30702
47	0.798062	1.09401	1.577	0.279317			46	0.437552	0.726863	1.02017	0.398655			46	1.18622	0.830443	0.390577	2.95841				46	1.89557	0.630876	0.658934	0.980377			46	1.37151	0.394761	0.231167	0.231452			46	0.770549	0.716653	1.29949	0.752225			46	1.31825	0.65401	1.15861	0.266667
48	1.1332	1.53125	0.575365	0.695535			47	0.565029	0.686804	0.905697	0.968582			47	0.793846	1.15445	0.678811	0.707853				47	0.702665	0.270682	0.990253	0.632681			47	2.06482	0.591232	0.513499	0.532236			47	0.645926	1.90042	1.01387	0.732075			47	0.616974	0.687443	1.79287	1.25626
49	0.735157	0.777366	1.5485	0.348426			48	0.457874	0.623232	0.644802	1.16289			48	0.743776	1.18929	0.239106	1.68903				48	0.635659	0.262521	1.02088	0.436877			48	0.863929	0.260377	0.607849	0.59366			48	1.03744	1.79419	0.836413	0.969344			48	0.478552	1.11316	0.382714	0.390588
50	1.18241	0.804785	0.575989	0.917873			49	0.566103	1.16297	1.70474	0.43379			49	0.859553	1.23574	1.15917	0.428665				49	0.291845	0.453963	1.80615	0.374311			49	0.931489	1.18602	0.569289	0.483638			49	0.345013	2.19377	1.33132	1.51499			49	1.01909	0.552	0.863058	0.708662
51	0.639901	1.45552	0.442694	1.57367			50	0.331328	0.495445	1.75666	0.794503			50	0.634246	1.16285	0.84339	0.652578				50	0.647575		0.836301	0.707798			50	1.04942	0.139864	0.525111	0.464995			50	0.374371	1.21563	0.706235	1.37221			50	0.572671	0.533227	0.900251	0.418348
52	1.29634	0.764378	0.260696	0.978896			51	0.339316	0.434604	0.816348	1.00698			51	0.187227	1.20761	3.03049	0.960432				51			1.15808	1.24856			51	1.80209	0.724539	0.2755	0.356057			51	0.483762	1.01655	0.985724	1.6387			51	0.420136	0.469003	1.8015	0.999242
53		1.38854	0.595615	0.309466			52	0.283239	0.525989	1.30098	1.29037			52		1.07645	0.963542	0.538716				52			1.04698	0.411388			52	2.11231		0.910276	0.717695			52	0.419944	0.59539	1.69555	0.633281			52	0.536353	1.08023	1.8008	0.773443
54		0.613657	0.786195	0.912903			53	1.02723	1.3065	0.506349	0.744603			53		3.27962	0.872577	1.01657				53			1.5727	1.00077			53	1.53408		1.2662	0.269649			53	0.797214	1.04468	1.42671	1.07806			53	0.863435	1.10222	0.519405	0.240668
55			0.79547	0.512551			54	1.16097	0.954329	1.45286	1.07349			54		1.37292	0.923662	0.983876				54			0.704976	0.421742			54	0.994218		0.692362	0.243115			54	0.911809	1.06098	1.01441	0.924637			54	1.20868	0.434275	0.748375	0.962214
56			0.453035	1.02073			55	1.43989	0.123209	1.0996	0.5449			55		1.9201	0.794712	1.73889				55			1.91489	0.528075			55	1.59968		0.312289	0.38077			55	1.63851	1.26348	1.37627	1.21669			55	1.06097	0.407727	1.08484	0.8354
57			0.439014	1.6466			56	1.01662	1.04444	0.925779	0.601518			56		1.01925	0.601458	0.859503				56			1.33162	0.455382			56	0.942377		1.05099	0.712459			56	0.55537		0.854401	1.07082			56	0.79352	0.476214	1.29228	0.991433
58			0.663287	0.511474			57	1.93639	1.36597	0.722088	1.35366			57		1.41801	0.564461	1.38612				57			0.685956	0.556102			57	0.525772		0.98301	0.333199			57	1.5202		0.876263	0.771431			57	0.505671	1.31657	2.46346	0.588051
59			1.31757	0.501693			58	0.794981	0.26871	2.16822	0.765258			58		1.53583	3.76234	1.03785				58			0.388527	0.306806			58	1.1866		1.83188	0.481581			58	1.25164		0.826252	1.22584			58	1.24461	0.45637	2.20758	0.330571
60			0.415244	0.501693			59	1.80489	0.676043	0.814878	0.787405			59		1.20971	0.754357	0.176787				59			0.998457	0.794456			59	1.03002		1.21218	0.165656			59	1.34228		1.02218	1.60575			59	0.336286		0.634896	0.812392
61			1.24223	1.15407			60	0.755743		1.95888	0.883282			60		0.758826	0.298011	0.383427				60			1.20933	0.275106			60	0.725001		1.39507	0.21051			60	0.619349		2.25415	0.936485			60	0.372586		0.372046	0.686778
62			0.568497	1.15407			61	0.47419		1.94296	1.1577			61		0.24388	2.4334	1.40885				61			0.722534	0.433397			61	0.359967		3.2175	0.712364			61	0.781112		0.920161	2.17028			61			0.40415	1.15858
63			0.732639	0.655109			62	1.85616		1.04576	1.02728			62		0.895121	2.50118	1.77853				62			2.72426	1.46221			62	0.594251		0.398326	0.147631			62	0.619069		0.995824	0.661351			62			0.278085	0.264758
64			0.728607	0.221533			63	0.741352		0.726505	0.377632			63		0.498653	1.71732	0.617257				63			1.50837	1.34969			63	1.15259		3.19801	0.323072			63	0.606834		1.19212	2.46993			63			2.81802	0.942219
65			0.580564	0.283793			64	0.714788		1.33536	0.981616			64		2.06691	0.270229	0.625508				64			0.342772	0.424331			64	1.16815		2.5929	2.32591			64	0.534431		0.896533	1.56891			64			1.32158	0.858228
66			0.514668	0.283793			65	0.649941		0.640453	0.623683			65		1.24907	0.591979	2.19843				65			0.745725	1.19903			65	0.732456		2.62571	0.820986			65	0.906797		0.827311	0.984311			65			0.904993	0.244699
67			1.27368	0.265709			66	1.94414		0.919478	1.20907			66		0.930408	2.75919	2.53183				66			0.642989	0.630702			66	0.295318		1.73207	0.737506			66	0.484559		1.26795	1.16475			66			0.277562	0.124692
68			0.982688	0.114566			67	1.06884		1.46606	1.2513			67		0.375481	1.72154	2.06263				67			1.59015	0.632			67			1.52025	0.501309			67	1.05375		1.05832	1.10673			67			3.15508	0.397455
69			1.15083	0.47069			68			0.523694	0.364152			68			0.182072	0.869383				68			2.53364	0.376107			68			1.39538	0.490652			68	2.01151		1.5748	1.48697			68			0.938766	0.287947
70			0.550178	0.356573			69			0.572198	0.355255			69			0.442936	2.2996				69			0.844209	1.09678			69			2.17561	0.8177			69			0.897527	1.61666			69			0.359957	2.05005
71			0.513891	0.620834			70			0.774961	0.563832			70			1.30247	3.23454				70			1.29735	1.03336			70			1.23342	0.498742			70			2.24601	1.17611			70			1.91287	0.762491
72			0.311508	1.69831			71			0.65027	0.408503			71			1.26218	1.84084				71			0.673494	0.665014			71			0.834201	0.350212			71			0.750088	0.648574			71			1.87978	0.408675
73			0.896586	1.25788			72			0.63759	1.54271			72			0.574007	0.777587				72			1.03503	1.82738			72			1.34801	0.799679			72			0.754117	0.883011			72			1.63243	1.118
74			0.543112	1.08978			73			0.702429	1.69517			73			0.185054	1.92712				73			0.699965	1.65599			73			0.528754	2.04082			73			1.43016	1.30593			73			2.65361	0.597765
75			0.494149	1.31626			74			1.1449	1.17129			74			0.338803	1.14398				74			0.559282	1.50772			74			1.1874	0.504868			74			0.877478	1.75144			74			0.917255	0.0594423
76			0.238087	1.11068			75			1.38393	1.11333			75			0.239843	0.388764				75			3.08566	1.39875			75			0.607647	0.454575			75			1.46018	1.24546			75			3.55128	0.0859506
77			0.490161	0.660253			76			3.01731	1.08771			76			0.5829	3.41722				76			2.42194	0.88267			76			1.23784	0.518436			76			1.15628	1.32477			76			3.99376	1.19234
78			0.987881	0.874886			77			0.800726	0.985606			77			0.236257	1.81073				77			0.656611	0.699769			77			1.06227	0.52167			77			0.904832	1.14048			77			1.21378	1.64982
79			0.480928	0.593685			78			0.860668	1.23619			78			0.359483	1.82634				78			0.502464	0.612541			78			0.709747	0.297893			78			0.688858	0.480137			78			2.06906	1.66596
80			1.28454	0.749357			79			0.59723	0.668193			79			0.254746	0.821176				79			0.64463	0.567114			79			1.00649	0.523721			79			0.62651	1.08702			79			0.255847	1.06683
81			0.879579	1.15142			80			1.63469	0.655721			80			0.799043	1.63395				80			0.605147	1.50426			80			0.754499	0.389205			80			1.61902	1.0009			80			0.700252	3.68854
82			0.737696	0.84781			81			0.428334	0.781102			81			2.09071	0.400057				81			0.506746	1.4097			81			0.863273	0.130514			81			1.08892	1.99514			81			0.550512	0.956581
83			2.89814	0.291694			82			0.82243	0.283582			82			0.794189	2.59791				82			2.03395	0.806247			82			1.12968	0.519373			82			0.726442	1.01421			82			0.822402	0.435532
84			1.10626	1.2285			83			1.57813	1.0006			83			0.560849	0.66064				83			1.33196	1.41485			83			0.405925	1.04272			83			0.797725	1.32309			83			1.25404	0.293138
85			0.702058	0.823892			84			1.3484	0.969001			84			0.276098	0.611901				84			0.739019	0.619879			84			2.09919	0.609883			84			0.415771	1.13798			84			0.205687	0.978972
86			0.6077	0.713191			85			0.883697	0.570483			85			0.239822	0.725906				85			1.21988	1.28378			85			0.419218	0.146518			85			0.639384	0.698787			85			0.975573	0.40993
87			1.25559	0.352244			86			1.51034	1.09473			86			1.11256	0.582537				86			0.98712	0.956921			86			0.520649	0.560729			86			0.716917	1.07453			86			1.51964	0.204559
88			2.65204	0.906935			87			2.00967	1.40951			87			0.357452	1.0539				87			0.497907	0.878527			87			0.957956	0.241288			87			0.773097	0.864571			87			3.68201	0.728397
89			0.77462	0.671283			88			0.95226	0.469557			88			0.288856	0.969585				88			1.29371	1.13559			88			1.82573	0.193981			88			1.62773	1.24532			88			3.95385	0.201366
90			1.41471	0.754228			89			1.7413	0.69567			89			0.368101	1.00717				89			0.581535	2.04392			89			0.43391	1.17515			89			1.2687	0.634207			89			1.00673	2.41808
91			1.91868	0.937089			90			1.62603	1.10663			90			1.22549	0.717355				90			1.03947	0.762861			90			0.842154	0.960691			90			0.852375	2.28149			90			0.220544	0.483756
92			0.852236	0.79888			91			0.867616	0.5716			91			0.295492	0.506002				91			0.533769	0.596858			91			0.671044	0.649683			91			1.24674	1.67885			91			0.099154	0.567702
93			1.57437	0.810271			92			0.923388	0.796992			92			1.2669	1.25327				92			0.88613	0.763943			92			0.58399	0.328054			92			0.98926	1.02652			92			2.51343	1.41408
94			0.469237	0.537412			93			0.649816	0.96552			93			2.68735	0.903546				93			0.425038	0.455275			93			0.623533	0.281874			93			0.844609	0.516817			93			1.31813	1.47111
95			0.804928	0.662654			94			0.566547	0.731264			94			1.66339	3.17525				94			0.893508	0.489647			94			2.21563	0.52944			94			0.79953	0.839602			94			0.50074	1.64629
96			1.13557	0.913052			95			1.35518	0.892926			95			0.27609	1.73358				95			0.240534	0.966681			95			0.451201	0.695824			95			1.68893	0.954751			95			0.176893	1.03775
97			1.214	0.539774			96			0.647527	1.41127			96			0.240943	0.541281				96			0.242655	0.848179			96			1.42637	0.30366			96			1.12976	0.992549			96			0.355259	0.278313
98			0.783679	0.569223			97			0.440685	0.385432			97			0.486053	0.360027				97			0.537874	0.703447			97			0.38533	0.20739			97			1.14678	1.22267			97			1.90815	1.04298
99			1.35969	0.237951			98			0.458799	1.38294			98			2.23531	0.444552				98			2.13699	0.542978			98			1.15982	0.117111			98			1.40407	1.26684			98			0.367374	0.220176
100			1.49168	0.845105			99			0.559146	1.17668			99			0.85629	1.09261				99			0.359133	0.962919			99			1.52868	0.775214			99			1.01404	1.36667			99			0.618502	0.225341
101			1.41137	0.446171			100			1.10721	0.427203			100			1.31321	1.61419				100			0.677321	0.802135			100			0.814013	0.730716			100			1.18652	1.22988			100			0.405277	0.619177
102			0.861822	0.7861			101			0.687269	0.423021			101			0.36183	1.09744				101			0.648771	0.675096			101			1.00065	0.565585			101			0.50353	0.865728			101			0.793292	0.357842
103			1.40014	0.657851			102			1.10586	0.471116			102			0.624828	1.90097				102			3.97096	0.681454			102			0.586237	0.645401			102			1.08696	1.20243			102			0.264229	0.786178
104			1.086	0.627727			103			0.593462	0.674191			103			0.384543	1.3203				103			0.517388	0.627498			103			0.615999	0.505219			103			0.76944	0.731678			103			0.952628	0.165542
105			0.540218	0.961469			104			0.650726	0.637759			104			0.748607	0.832917				104			0.821204	0.533501			104			0.55275	1.00467			104			0.217346	0.835547			104			1.83438	0.348169
106			1.25556	1.05845			105			1.21428	0.584164			105			0.342824	1.23762				105			0.333417	0.216941			105			0.531279	0.954186			105			0.688941	1.06671			105			1.68262	0.172264
107			1.32474	0.952974			106			0.631251	0.693517			106			1.90816	0.306581				106			3.32937	0.698597			106			0.683575	0.45575			106			0.652873	1.28978			106			1.05174	0.516185
108			0.829313	0.423338			107			1.00194	0.551466			107			1.52364	0.315245				107			0.862427	0.180749			107			1.39038	0.360101			107			1.22291	0.449521			107			0.352634	1.72841
109			1.17358	1.53799			108			0.909656	0.485878			108			1.01079	0.819694				108			0.680169	0.367278			108			0.743627	0.288201			108			0.567538	1.33364			108			0.312713	0.3516
110			0.465463	0.811582			109			1.20293	0.683612			109			0.607161	2.09169				109			0.656756	0.448444			109			1.35729	0.63929			109			0.624393	0.818517			109			0.690195	0.302935
111			0.570467	0.26775			110			0.724781	0.970535			110			0.269929	0.644527				110			0.320759	0.70826			110			1.34889	0.402489			110			0.719931	0.988412			110			0.416973	0.291166
112			0.304872	0.703038			111			0.40242	0.226672			111			1.24402	0.643067				111			0.694323	0.329543			111			0.811598	0.506358			111			0.709303	0.730472			111			0.470699	0.26075
113			0.229139	0.199178			112			0.81926	0.928422			112			0.435759	1.04002				112			0.241975	0.299179			112			1.11487	0.28867			112			0.702614	1.67216			112			0.541078	0.396373
114			0.594166	0.297036			113			0.731482	0.695929			113			0.446873	0.429672				113			0.460834	0.287865			113			0.95611	0.877963			113			0.569522	1.36149			113			0.667926	1.61081
115			0.246847	0.563053			114			0.633917	0.516304			114			0.474455	0.467138				114			1.0386	0.855063			114			0.394114	0.742263			114			0.990524	1.36008			114			0.84363	0.590176
116			0.637733	0.18546			115			1.07654	1.14282			115			0.633323	1.70703				115			0.470115	0.443697			115			1.59272	0.854019			115			1.35923	1.14431			115			2.86443	1.12858
117			0.355353	0.254182			116			0.515325	0.96593			116			0.996824	1.13373				116			0.845188	0.424239			116			1.42774	0.507685			116			0.826111	0.676078			116			0.397695	0.583261
118			0.121997	0.313556			117			0.338182	1.21092			117			0.835581	0.301616				117			0.747144	0.411085			117			0.91542	1.3164			117			0.540217	1.05393			117			1.29465	0.180426
119			0.758606	0.765495			118			0.378634	0.623817			118			1.5084	0.379061				118			0.431693	0.372762			118			0.826857	1.45111			118			0.327211	1.01665			118			0.595342	1.65292
120			0.623792	0.661249			119			0.664721	0.724872			119			0.198244	1.37051				119			0.196826	0.757936			119			0.237644	0.302397			119			0.501965	0.962885			119			0.225174	0.504042
121			0.59097	1.37426			120			1.50789	0.812066			120			0.109696	0.587767				120			0.584779	0.825603			120			0.905744	0.78985			120			0.540445	0.48818			120			0.69829	0.438127
122			1.2811	1.96087			121			0.789228	0.431294			121			0.624131	0.771512				121			0.688551	0.709029			121			0.495358	0.160623			121			1.063	1.26956			121			0.237673	1.25007
123			0.716458	2.29819			122			1.14778	0.685618			122			0.81043	1.92211				122			1.04918	0.332635			122			0.713372	2.5073			122			0.593811	0.709819			122			0.491309	1.43538
124			0.420998	1.48647			123			0.51051	0.991407			123			0.221985	2.38769				123			0.586812	1.40538			123			0.537484	0.334164			123			1.30149	1.40878			123			1.92048	1.05914
125			0.245839	1.28517			124			0.341416	1.34792			124			1.05214	0.428707				124			0.661033	0.460677			124			0.897754	0.303334			124			0.920768	0.429606			124			0.381464	0.689695
126			1.35296	1.31309			125			1.68908	1.17148			125			1.22971	0.987754				125			0.503128	1.71151			125			0.929013	0.487461			125			0.77709	0.631468			125			0.536549	0.45972
127			0.536713	0.785294			126			0.257747	0.692012			126			0.491716	1.5948				126			0.698077	3.59091			126			1.34055	0.241788			126			0.626301	0.249418			126			0.652217	1.14097
128			1.39236	1.23213			127			0.283668	0.745562			127			0.442311	1.98853				127			0.253352	1.31766			127			1.52991	1.32075			127			1.03286	0.495804			127			0.144039	1.85835
129			1.17738	1.52675			128			0.468722	1.8157			128			2.98796	0.997957				128			0.29993	0.607317			128			0.549376	0.312999			128			0.990003	1.20168			128			1.46435	1.42616
130			0.65318	1.44113			129			1.24041	1.57985			129			1.77013	1.8318				129			0.363169	0.591047			129			2.60146	0.581098			129			0.633552	0.510178			129			2.07256	1.32452
131			0.639333	0.967924			130			0.708484	0.655513			130			4.00419	0.213764				130			3.97448	0.873161			130			1.1646	0.405575			130			0.719735	0.939006			130			0.858254	0.506485
132			1.49915	1.49636			131			0.397725	1.20856			131			0.643689	0.177582				131			0.458024	0.476077			131			1.47186	0.385746			131			0.566299	1.01546			131			0.475687	0.694783
133			0.500093	1.22421			132			0.650761	0.450194			132			0.103897	2.12705				132			0.595095	2.12793			132			0.559605	0.446602			132			0.759279	1.13499			132			4.05466	1.27394
134			0.72907	0.735501			133			0.361105	0.711232			133			0.517747	0.46958				133			0.929945	0.901362			133			0.725171	0.346849			133			0.539795	1.45069			133			2.02657	2.31521
135			0.997424	1.43809			134			0.574267	1.79009			134			0.399845	0.909133				134			0.284221	0.763568			134			0.423366	0.285294			134			0.973303	1.23542			134			2.32378	1.17063
136			0.647864	0.616412			135			0.946534	1.40787			135			0.747882	1.07179				135			0.956663	6.74327			135			0.382975	0.542278			135			0.71675	1.28608			135			3.39934	0.592098
137			0.58561	0.859132			136			0.540098	0.818104			136			0.590534	1.24291				136			2.51793	0.706909			136			1.65703	0.62565			136			0.792267	0.593065			136			0.792174	0.857123
138			0.866635	0.749612			137			0.541658	3.99817			137			0.610277	4.09529				137			1.29568	2.29708			137			1.01412	0.235814			137			0.830546	1.01777			137			0.395605	0.725989
139			0.968904	0.680513			138			0.57025	0.804861			138			1.37339	1.69087				138			0.607622	0.758824			138			1.84206	0.736739			138			0.812921	0.721025			138			1.0216	1.2852
140			0.384201	1.09917			139			0.606567	0.265264			139			1.52227	1.89642				139			0.71725	1.47988			139			0.261966	0.36412			139			1.48907	0.956701			139			2.30207	0.689122
141			0.836322	1.28367			140			0.875567	1.79891			140			0.744877	1.52028				140			0.25572	1.67171			140			0.514213	0.0880748			140			0.39024	1.63339			140			1.46528	0.777079
142			0.348885	0.775803			141			0.332009	0.984893			141			1.30043	1.40781				141			0.781143	1.13098			141			2.09536	0.328196			141			0.602241	0.577603			141			0.728553	0.847009
143			0.398078	0.261253			142			0.579747	1.03827			142			0.340752	0.996344				142			0.753745	0.513816			142			1.86189	0.270233			142			0.370176	0.788396			142			1.24649	1.34714
144			0.99198	0.310133			143			0.821777	1.19593			143			0.557299	1.91334				143			0.433577	0.325716			143			1.48554	0.912603			143			0.399918	0.502728			143			2.10991	0.676292
145			0.691794	0.8658			144			1.88331	1.35223			144			0.295828	0.844325				144			0.756009	0.806063			144			0.452623	0.58267			144			0.702779	1.03177			144			1.04053	3.05509
146			1.40327	0.607392			145			0.482985	0.870094			145			0.374341	2.43516				145			0.36658	0.918068			145			0.393664	0.294871			145			1.17048	1.13213			145			0.419278	1.30659
147			0.60545	0.633865			146			0.33784	0.80655			146			0.192367	1.6692				146			0.692449	1.36161			146			1.02591	0.651304			146			1.25575	0.740352			146			1.23098	0.438147
148			0.431527	0.618894			147			0.502011	0.328626			147			0.854032	1.11926				147			0.44574	1.77285			147			0.813795	1.16545			147			2.40934	0.813819			147			0.497475	2.39288
149			0.442695	0.404878			148			0.870905	1.18969			148			1.41657	1.4081				148			0.314835	2.03775			148			0.841683	0.245092			148			0.742212	1.47882			148			0.808939	2.12582
150			0.305852	0.610163			149			1.37634	0.91172			149			1.25433	2.60582				149			0.187062	0.907568			149			1.15251	0.397124			149			0.764903	0.397502			149			1.54125	2.03504
151			0.546514	1.02357			150			1.07291	1.0064			150			1.79872	0.528089				150			0.288125	0.42748			150			0.549632	0.475524			150			1.37223	0.911416			150			0.449728	0.372046
152			0.447205	0.899568			151			0.631186	1.02241			151			0.258991	0.296471				151			0.48317	0.681584			151			0.514974	0.648671			151			1.62723	0.938562			151			0.316794	0.396126
153			0.896382	0.684878			152			0.846358	1.21607			152			0.451143	3.80458				152			0.780105	0.619751			152			1.0284	0.970608			152			1.28446	0.417873			152			1.78503	0.412337
154			0.689495	1.09432			153			0.901151	1.85025			153			0.584625	1.84491				153			0.48324	0.60875			153			1.53003	0.436629			153			1.21579	0.394964			153			1.85418	1.1267
155			0.516622	0.480958			154			0.415738	0.34354			154			1.39728	0.833245				154			1.56875	0.370813			154			1.96326	0.52625			154			2.12706	0.577563			154			1.61736	2.34102
156			0.878424	0.139207			155			0.442718	1.03751			155			0.573445	1.03715				155			0.726557	0.533973			155			0.989444	0.244911			155			1.15269	1.3495			155			2.25504	2.18631
157			0.679445	0.702635			156			0.477748	0.686694			156			0.706276	0.836229				156			0.394392	0.625857			156			1.92147	0.367628			156			1.4412	0.990668			156			1.16348	4.6152
158			0.26862	0.575642			157			1.00866	3.00392			157			1.50553	4.23109				157			0.786844	0.419395			157			0.70647	0.182605			157			1.2892	0.726257			157			1.20662	1.01543
159			0.289614	0.413281			158			0.534544	0.922577			158			0.335833	1.00793				158			0.705947	0.481513			158			0.662763	0.381973			158			1.4607	0.421794			158			0.534796	0.800873
160			1.37483	0.676416			159			1.21749	1.37776			159			0.429526	0.428088				159			0.610431	0.571261			159			0.813259	0.362541			159			0.399989	1.008			159			0.507012	0.852613
161			1.24455	0.188446			160			0.588952	0.643913			160			0.65337	1.63932				160			0.896663	0.53778			160			0.537984	0.568718			160			0.35347	1.56684			160			0.726448	0.380857
162			2.09259	0.571658			161			1.11413	0.268911			161			0.824166	1.12952				161			0.429285	0.503547			161			0.520388	0.318059			161			1.27781	1.23926			161			0.493118	0.804726
163			1.48908	0.0925252			162			0.523922	0.990601			162			0.686547	1.82004				162			0.2845	0.761829			162			0.856226	0.860292			162			1.09284	1.44561			162			1.16927	0.458506
164			1.69221	0.936798			163			0.419949	1.15983			163			1.25964	0.525868				163			0.920247	1.31412			163			1.24983	0.311209			163			0.943304	1.10097			163			0.508161	2.15833
165			0.665207	0.641193			164			0.367725	0.523138			164			1.00241	0.704461				164			0.340378	0.953904			164			0.847701	0.464878			164			0.879405	2.21358			164			1.58656	1.3429
166			1.28093	0.428949			165			1.69543	0.548037			165			1.0876	1.18735				165			0.395682	1.67425			165			0.592584	0.618117			165			0.711467	0.431857			165			3.51794	2.47764
167			2.69827	0.357685			166			0.923727	0.470575			166			0.385039	0.459789				166			0.37692	0.629613			166			1.52901	1.10288			166			1.26555	1.70828			166			1.4698	1.23092
168			0.981098	0.672195			167			0.988326	0.784083			167			1.05435	0.98059				167				0.957389			167			0.480901	0.801704			167			0.607108	0.432725			167			3.065	3.66007
169			0.826485	0.487429			168			0.962457	0.940128			168			1.11698	0.938141				168				0.924613			168			0.333577	0.261792			168			0.956645	1.55808			168			2.59721	0.717827
170			1.63409	0.694251			169			0.647302	0.452084			169			0.768209	0.939087				169				0.414075			169			0.237574	0.308861			169			1.32613	1.23158			169			1.41135	1.27734
171			1.92773	0.280696			170			0.463823	0.79305			170			1.13567	2.23697				170				0.695286			170			0.377875	0.258547			170			0.790687	1.09907			170			0.660052	0.245964
172			1.38221	0.490385			171			1.03033	1.08633			171			0.928673	0.600835				171				1.98852			171			0.543005	0.258547			171			0.788524	0.944201			171			1.15926	0.218533
173			2.26437	0.41194			172			0.549291	0.551178			172			2.0154	2.86828				172				1.9224			172			1.10932	0.351468			172			0.968652	0.757451			172			0.466847	0.657031
174			0.883247	0.276654			173			0.672317	0.405475			173			0.885928	1.62966				173				1.36837			173			0.75554	1.08496			173			0.714137	0.302737			173			0.432898	0.364503
175			0.632879	0.371086			174			0.524939	1.06978			174			1.16521	0.91175				174				1.31489			174			0.485309	0.0561564			174			2.13392	0.223556			174			0.971832	0.637351
176			0.913165	0.597963			175			0.952064	0.588552			175			0.836306	1.11167				175				1.23264			175			0.939784	2.97065			175			0.675471	0.789509			175			0.225168	1.12557
177			0.889905	0.353577			176			1.4163	0.517895			176			0.966799	0.779932				176				0.710179			176			0.641296	0.30034			176			0.967051	0.918623			176			1.35523	2.72896
178			1.02653	0.945835			177			0.540637	1.15405			177			0.244493	1.90367				177				0.350627			177			0.811892	1.85868			177			1.14584	0.935256			177			1.21988	1.55804
179			2.23204	1.04468			178			0.448222	0.17842			178			0.228745	0.723347				178				1.18969			178			0.380904	0.163079			178			0.931846	0.605481			178			0.954391	0.437205
180			1.98133	0.169881			179			0.351813	0.582303			179			0.254259	1.07148				179				0.541176			179			0.611504	0.726934			179			1.05052	0.714454			179			0.358915	2.3453
181			1.59481	0.113871			180			0.864617	1.21823			180			1.0548	1.53783				180				0.537785			180			1.0253	0.394481			180			0.419082	1.52333			180			0.500085	0.527572
182			0.715935	0.441576			181			2.36931	0.732142			181			0.220251	0.358556				181				0.321119			181			2.61256	0.696955			181			0.269952	0.86694			181			0.127496	0.292314
183			1.51013	0.196617			182			2.04104	1.02182			182			0.781953	1.65156				182				9.53576			182			1.41268	0.256503			182			0.76222	0.877411			182			0.316814	4.14112
184			1.34753	0.052358			183			0.337268	1.03853			183			0.822986	1.51832				183				0.620967			183			0.750876	0.412026			183			0.644297	1.11832			183			0.332721	1.37709
185			3.99867				184			1.20549	0.577309			184			1.73505	0.731075				184				0.682496			184			0.435541	1.20736			184			0.652146	0.922551			184			0.373945	0.421093
186			1.43407				185			0.900771	0.431157			185			0.584221	1.5414				185				0.706357			185			1.62101	0.616464			185			1.71714	0.64221			185			0.613301	0.746077
187			1.03198				186			1.92036	0.725732			186			0.460137	0.407858				186				0.587737			186			0.576212	0.278975			186			0.993134	1.25174			186			0.492733	1.22776
188			1.59667				187			1.04497	1.03264			187			0.447485	0.281749				187				0.496995			187			0.438802	0.456601			187			0.727515	0.903372			187			0.276588	0.667956
189			0.931568				188			0.532864	0.763106			188			2.78854	3.05408				188				0.518292			188			0.340749	0.249402			188			0.900332	1.12432			188			0.382322	0.468056
190			1.86229				189			0.36937	0.799755			189			1.72356	1.24091				189				0.213317			189			0.265427	0.232471			189			1.07898	0.830305			189			0.668915	1.20499
191			1.53838				190			0.350192	0.854341			190			0.425405	0.924479				190				0.991566			190			0.155833	0.242476			190			0.696707	1.22794			190			1.42662	1.2131
192			1.27552				191			0.326563	0.566508			191			2.39381	1.48345				191				0.423035			191			1.1399	1.41787			191			0.901399	0.945276			191			0.805436	0.238735
193			1.41013				192			0.748599	0.692233			192			4.46785	0.600068				192				0.76887			192			2.00025	1.25308			192			1.39343	1.37867			192			1.74095	0.672026
194			0.807748				193			1.51148	0.683427			193			1.33077	2.03486				193				0.579734			193			0.541187	0.558321			193			0.718758	1.51257			193			0.158365	0.383517
195			0.701251				194			1.86865	0.35023			194			0.297926	2.53638				194				0.424991			194			0.947452	0.196622			194			0.600183	1.63353			194			0.974536	0.0678871
196			1.19519				195			1.62064	1.17755			195			1.93568	1.19388				195				0.587666			195			1.63756	0.45554			195			0.664419	0.764455			195			0.183716	0.66161
197			0.273442				196			0.471788	0.472118			196			0.830212	0.443946				196				0.497093			196			0.221004	1.29934			196			0.81435	1.7966			196			1.02975	0.271789
198			0.431598				197			1.66512	1.02153			197			1.67146	0.315657				197				1.53934			197			0.179212	0.236397			197			0.417437	1.43631			197			0.124939	0.763931
199			1.9239				198			0.628316	1.13922			198			0.5684	1.41178				198				0.387673			198			0.637965	0.247353			198			0.515387	0.591504			198			1.2481	0.662246
200			0.629499				199			1.91002	0.912324			199			0.391632	0.413683				199				1.58488			199			5.02883	0.41183			199			1.13538	0.669024			199			1.71577	0.45731
201			0.661941				200			1.44381	0.751436			200			2.95825	2.1107											200			1.10148	1.15054			200			0.518836	2.25814			200			1.06768	0.417912
202			3.98304				201			0.764908	1.09913			201			0.152695	2.1995											201			0.65864	1.11536			201			0.720973	2.30121			201			0.425622	1.2155
203			2.80824				202			1.71327	1.0597			202			1.83091												202			0.126385	0.322253			202			0.70248	0.719042			202			0.686225	2.24137
204			1.20844				203			0.687407	1.02966			203			0.356154												203			0.306473	1.23114			203			0.400415	0.438871			203			1.32911	1.45089
205			1.54664				204			0.485653	0.807465			204			0.775773												204			5.61516	2.36443			204			0.478358	1.27423			204			1.82275	0.50862
206			0.340571				205			0.408126	1.11582			205			0.446497												205			6.41965	1.15321			205			1.23699	1.54119			205			0.319096	0.146686
207			0.793915				206			0.602673	0.46522			206			0.874512												206			1.07055	0.319549			206			1.08368	1.32635			206			1.43553	1.24877
208			1.06354				207			0.818475	0.896568			207			0.340049												207			0.611722	0.95828			207			1.67417	1.23385			207			0.234525	0.773865
209			0.412688				208			0.852766	0.717871			208			1.72815												208			1.01841	0.267309			208				1.12964			208			0.514449	0.295859
210			0.419124				209			1.13173	2.30355			209			0.610459												209			1.8254	1.50443			209				0.599694			209			0.956684	0.203997
211			0.974277				210			1.59092	0.17589			210			0.271005												210			1.04131	0.224248			210				1.52243			210			0.140012	0.671948
212			0.731845				211			0.742589	0.246307			211			2.85361												211			0.709516	1.86194			211				0.779414			211			0.220099	0.59145
213			1.24898				212			1.0624	0.300131			212			1.19732												212			1.64837	1.13821			212				0.774085			212			0.949771	1.14649
214			1.03916				213			2.3978	0.492442			213			0.646118												213			1.30735	0.386969			213				0.971161			213			1.1721	0.337089
215			0.889673				214			1.37078	1.42095			214			1.064												214			0.828689	1.20586			214				0.847172			214			3.35151	0.185417
216			0.311395				215			0.95637				215			1.72561												215			1.15764	0.82436			215				1.38183			215			1.42696	1.04106
217			0.203828				216			1.6998				216			0.679025												216			2.92819	0.515591			216				1.2965			216			2.02495	0.534506
218			1.59001				217			1.06635				217			4.01794												217			1.0017	1.05703			217				1.1099			217			0.245421	0.265954
							218			0.852235				218			0.880386												218			0.774371	1.20342			218				2.33868			218			0.876042	4.42601
							219			1.37003				219			0.995246												219			0.407343	0.486162			219				1.72905			219			0.816722	2.27419
							220			0.640359				220			1.46519												220			0.799722	0.621478			220				0.618756			220			0.312328	1.42377
							221			1.63125				221			0.653372												221			1.88333	0.351701			221				0.716552			221			1.34998	0.235832
							222			0.946275				222			1.01124												222			2.68445	0.503112			222				1.25411			222			0.430041	1.36429
							223			1.35956				223			1.02604												223			0.987906	0.481192			223				0.87172			223			0.747231	0.963495
							224			0.616732				224			0.788379												224			3.5026	0.636601			224				1.48098			224			0.495131	0.304146
							225			0.712552				225			0.390711												225			0.886615	0.565606			225				1.10757			225			0.161137	0.322341
							226			1.12427				226			0.842517												226			0.376747	0.668693			226				0.730959			226			0.676249	1.50626
							227			0.710982				227			0.491079												227			0.814923	1.30438			227				1.40622			227			0.445219	0.461068
							228			1.2063				228			1.0516												228			0.692072	0.407451			228				0.820915			228			1.2925	1.45188
							229			1.26396				229			0.796629												229			0.887558	0.642818			229				1.1913			229			1.23485	0.808771
							230			1.40934				230			0.25117												230			1.09886	1.72019			230				1.42721			230			0.302149	1.23052
							231			1.09347				231			0.340982												231			2.35716	2.44475			231				0.893437			231			0.834298	1.35987
							232			0.641413				232			0.269568												232			0.881237	0.555714			232				1.03435			232			1.34366	1.01296
							233			1.09276				233			0.843184												233			1.16858	0.312733			233				1.19698			233			1.45453	0.926432
							234			0.698243				234			1.90009												234			0.835772	0.790871			234				1.0584			234			1.14583	0.273892
							235			0.597744				235			1.08535												235			0.392886	0.708247			235				0.801108			235			0.968404	1.03783
							236			1.14907				236			0.809731												236			0.550091	0.68713			236				1.02902			236			0.55	0.626448
							237			0.887245				237			0.904363												237			1.68531	0.502531			237				0.546548			237			0.491864	0.755676
							238			0.606059				238			1.32342												238			0.744306	0.63285			238				1.53129			238			0.403694	1.24661
							239			1.33554				239			0.768187												239			0.292507	0.740769			239				0.617218			239			0.490095	0.380403
							240			0.428639				240			0.906848												240			0.210655	1.12009			240				1.15484			240			1.34359	2.19866
							241			0.491765				241			0.96442												241			0.992007	0.73946			241				0.408159			241			0.617266	0.532458
							242			0.45085				242			0.958436												242			0.866794	1.08743			242				1.71453			242			0.293728	0.255928
							243			0.985606				243			0.9194												243			0.772078	0.597012			243				1.25894			243			0.907715	0.131055
							244			0.858291				244			0.364875												244			1.32152	0.829738			244				1.59645			244			1.21474	0.387511
							245			0.771837				245			0.704428												245			0.504971	0.882493			245				1.41363			245			0.676693	1.01611
							246			0.391003				246			1.12466												246			1.62594	0.2717			246				1.34282			246			0.0741272	0.54134
							247			1.74971				247			1.35651												247			1.16478	0.996891			247				1.21783			247			0.789933	0.132309
							248			1.46876				248			0.378549												248			0.672653	0.290604			248				1.06089			248			0.240671	0.83784
							249			0.994148				249			0.467903												249			0.647261	0.612164			249				1.26682			249			1.17715	0.180258
							250			1.12271				250			0.828722												250			0.784246	0.842876			250				0.660942			250			0.428079	0.971106
							251			1.0569				251			0.815534												251			1.14872	0.39105			251				1.02818			251			1.16571	0.120763
							252			0.885423				252			0.95133												252			0.924423	0.615811			252				1.39577			252			0.727725	1.30072
							253			2.48804				253			2.45865												253			0.860415	0.549977			253				0.747985			253			0.149707	0.186292
							254			0.705476				254			2.63773												254			0.720134	1.05053			254				1.34782			254			0.207819	1.224
							255			0.725221				255			0.429686												255			1.0519	0.426547			255				0.833263			255			0.514841	2.0308
							256			1.0867				256			1.47321												256			0.767012	1.30205			256				0.9751			256			1.10882	1.27705
							257			1.89986				257			3.87189												257			1.20322	0.123229			257				1.18903			257			0.403278	0.360244
							258			0.587527				258			1.30461												258			0.809955	1.10252			258				1.03105			258			0.157168	0.40992
							259			1.69827				259			0.786389												259			0.277597	0.236807			259				0.851868			259			0.92186	0.60921
							260			0.79156				260			1.44929												260			0.492039	0.197921			260				1.18714			260			0.155163	0.537608
							261			0.51833				261			0.597568												261			0.370026	0.366587			261				0.848644			261			0.221479	0.952932
							262			0.988933				262			0.425887												262			0.418431	0.664887			262				0.477783			262			0.485141	1.21448
							263			0.804921				263			0.917147												263			1.29751	0.785904			263				1.3413			263			0.83872	0.632838
							264			0.961598				264			2.01511												264			0.458516	0.443779			264				1.1239			264			0.944127	1.11632
							265			0.574467				265			0.469679												265			1.46419	0.396093			265				2.17697			265			0.383345	1.45323
							266			0.835575				266			0.258365												266			0.560109	0.49307			266				3.46373			266			0.413446	3.11008
							267			0.338451				267			0.837151												267			0.852285	0.527392			267				1.76597			267			1.63551	1.63487
							268			0.489669				268			0.610556												268			0.454096	1.09675			268				1.39387			268			1.20475	1.84301
							269			1.36022				269			0.310764												269			0.35749	0.480229			269				1.09954			269			0.112344	1.71975
							270			0.98355				270			1.47503												270				0.509627			270				0.494871			270			0.348443	0.438766
							271			0.863601				271			0.57069												271				0.316916			271				1.43786			271			0.953046	0.849222
							272			1.16336				272			0.138427												272				0.719819			272				0.733352			272			0.223984	0.462417
							273			0.506358				273			0.320324												273				0.599726			273				2.61758			273			0.210593	0.352746
							274			0.426272				274			0.678217												274				0.227287			274				1.05618			274			0.132249	0.896204
							275			0.497801				275			1.01162												275				0.358334			275				1.08904			275			0.369371	0.693154
							276			1.22373				276			0.566029												276				0.3525			276				2.64387			276			0.322332	0.22459
							277			1.13453				277			0.276447												277				0.94685			277				1.04942			277				0.203807
							278			1.04891				278			0.283876												278				0.384088			278				2.29825			278				0.398569
							279			1.62635				279			0.891666												279				0.585511			279				1.85918			279				1.61539
							280			1.3176				280			1.1469												280				0.333983										280				0.996032
							281			1.13866				281			0.989711												281				1.42539										281				0.975366
							282			1.63831				282			0.185139												282				0.444841										282				0.445914
							283			0.385422				283			0.819179												283				1.11416										283				1.3749
							284			1.73541				284			0.238833												284				0.954811										284				0.353789
							285			0.984426				285			1.29759												285				2.30666										285				0.89236
							286			0.614152				286			0.329007												286				0.19801										286				0.220909
							287			0.446904				287			2.0076												287				0.38034										287				0.242876
														288			0.258014												288				1.12305										288				1.01965
														289			0.243482												289				0.206741
														290			1.56891												290				0.216122
														291			0.680599												291				0.857806
														292			1.2447												292				0.356068
														293			0.501918												293				0.66647
														294			2.50669												294				0.398946
														295			1.11341												295				0.905373
														296			0.525457												296				0.608239
														297			0.881735												297				0.237679
														298			0.356247												298				0.247263
														299			0.701694												299				0.109773
														300			2.0504												300				0.259689
														301			0.68397												301				0.294254
														302			0.664005												302				0.291926
														303			1.4346
														304			1.07802
														305			0.734849
														306			2.10042
														307			0.35079
														308			0.252141
														309			0.819801
														310			0.451139
														311			0.774422
														312			0.223281
														313			0.22054
[truncated: 65 more columns]

## Sheet: Figure S6 Wg-Gal4 GOF
T1-T3
control	typical mitotic NBs	typical mitotic GMCs	symmetric NBs	asymmetric GMCs		P-values
1 wg-Gal4	4	7	0	0	0.05	0.01	0.001
2 wg-Gal4	5	4	0	0	*	**	***
3 wg-Gal4	7	6	0	0
4 wg-Gal4	6	8	0	0
5 wg-Gal4	5	6	0	0
sum	27	31	0	0
average	5.4	6.2	0	0
SD	1.14018	1.48324	0	0
SEM	0.509902	0.663325	0	0
T1-T3
wg>erm, tll	typical mitotic NBs	typical mitotic GMCs	symmetric NBs	asymmetric GMCs
1-wg>erm, tll	7	11	2	0
2-wg>erm, tll	7	13	2	0
4-wg>erm, tll	7	10	0	0
5-wg>erm, tll	8	8	2	0
6-wg>erm, tll	4	14	1	0
sum	33	56	7	0
average	6.6	11.2	1.4	0
SD	1.51658	2.38747	0.894427	0
t test	0.197822	0.00585802	0.0248962
SEM	0.678233	1.06771	0.4	0
T1-T3
wg>Tetra	typical mitotic NBs	typical mitotic GMCs	symmetric NBs	asymmetric GMCs
1-wg>Tetra	10	15	2	0
2-wg>Tetra	6	14	1	0
3-wg>Tetra	8	10	0	0
4-wg>Tetra	4	15	0	0
5-wg>Tetra	16	20	1	1
sum	44	74	4	1
average	8.8	14.8	0.8	0.2
SD	4.60435	3.56371	0.83666	0.447214
T test	0.176476	0.00346286	0.0993007	0.373901
SEM	2.05913	1.59374	0.374166	0.2
STATISTIC ANALYSIS						total row5 NBs
						T1-T3	36			figure	z stacks
	control	wg>double	wg>tetra							control	8
Test for normal distribution										double	20
Shapiro-Wilk test										tetra	14
W	0.9609	0.7683	0.9427
P value	0.814	0.0435	0.6853
Passed normality test (alpha=0.05)?	Yes	No	Yes
P value summary	ns	*	ns
Kolmogorov-Smirnov test
KS distance	0.2371	0.404	0.1972
P value	>0.1000	0.0076	>0.1000
Passed normality test (alpha=0.05)?	Yes	No	Yes
P value summary	ns	**	ns
Number of values	5	5	5
Table Analyzed	typical NB
Kruskal-Wallis test
P value	0.2449
Exact or approximate P value?	Exact
P value summary	ns
Do the medians vary signif. (P < 0.05)?	No
Number of groups	3
Kruskal-Wallis statistic	2.867
Data summary
Number of treatments (columns)	3
Number of values (total)	15
typical GMC	control	wg>double	wg>tetra
Test for normal distribution
Shapiro-Wilk test
W	0.9556	0.9738	0.9339
P value	0.7773	0.8989	0.6231
Passed normality test (alpha=0.05)?	Yes	Yes	Yes
P value summary	ns	ns	ns
Kolmogorov-Smirnov test
KS distance	0.2464	0.1746	0.2776
P value	>0.1000	>0.1000	>0.1000
Passed normality test (alpha=0.05)?	Yes	Yes	Yes
P value summary	ns	ns	ns
Number of values	5	5	5
Table Analyzed	typical GMC
Data sets analyzed	A-C
ANOVA summary
F	13.58
P value	0.0008
P value summary	***
Significant diff. among means (P < 0.05)?	Yes
R square	0.6936
Brown-Forsythe test
F (DFn, DFd)	0.5957 (2, 12)
P value	0.5667
P value summary	ns
Are SDs significantly different (P < 0.05)?	No
Bartlett's test
Bartlett's statistic (corrected)	2.554
P value	0.2788
P value summary	ns
Are SDs significantly different (P < 0.05)?	No
ANOVA table	SS	DF	MS	F (DFn, DFd)	P value
Treatment (between columns)	186.5	2	93.27	F (2, 12) = 13.58	P=0.0008
Residual (within columns)	82.4	12	6.867
Total	268.9	14
Data summary
Number of treatments (columns)	3
Number of values (total)	15
Table Analyzed	sym NB
Data sets analyzed	A-C
ANOVA summary
F	4.933
P value	0.0273
P value summary	*
Significant diff. among means (P < 0.05)?	Yes
R square	0.4512
Brown-Forsythe test
F (DFn, DFd)	1.636 (2, 12)
P value	0.2353
P value summary	ns
Are SDs significantly different (P < 0.05)?	No
Bartlett's test
Bartlett's statistic (corrected)
P value
P value summary
Are SDs significantly different (P < 0.05)?
ANOVA table	SS	DF	MS	F (DFn, DFd)	P value
Treatment (between columns)	4.933	2	2.467	F (2, 12) = 4.933	P=0.0273
Residual (within columns)	6	12	0.5
Total	10.93	14
Data summary
Number of treatments (columns)	3
Number of values (total)	15
Table Analyzed	asym GMC
Data sets analyzed	A-C
ANOVA summary
F	1
P value	0.3966
P value summary	ns
Significant diff. among means (P < 0.05)?	No
R square	0.1429
Brown-Forsythe test
F (DFn, DFd)	1.000 (2, 12)
P value	0.3966
P value summary	ns
Are SDs significantly different (P < 0.05)?	No
Bartlett's test
Bartlett's statistic (corrected)
P value
P value summary
Are SDs significantly different (P < 0.05)?
ANOVA table	SS	DF	MS	F (DFn, DFd)	P value
Treatment (between columns)	0.1333	2	0.06667	F (2, 12) = 1.000	P=0.3966
Residual (within columns)	0.8	12	0.06667
Total	0.9333	14
Data summary
Number of treatments (columns)	3
Number of values (total)	15

## Sheet: Figure S12
Figure S11
	B1-B2 Bsh levels, 3 embryos				B1-B2 Hbn levels, 3 embryos				B1-B2 Rx levels, 3 embryos
Average	1	0.485044		Average	1	0.682951		Average	1	0.392414				P-values
SD	0.398348	0.313662		SD	0.510002	0.411839		SD	0.475917	0.194854			0.05	0.01	0.001
SEM	0.0766621	0.0581886		SEM	0.0481907	0.039814		SEM	0.056883	0.0361835			*	**	***
T-test		2.30798e-06		T-test		8.60111e-07		T-test		1.81735e-14
NB number	Control	Pros>Ubx, abd-A, Abd-B			Control	Pros>Ubx, abd-A, Abd-B			Control	Pros>Ubx, abd-A, Abd-B
	Normalyzed Fluorescence	Normalyzed Fluorescence		NB Count	Normalyzed Fluorescence	Normalyzed Fluorescence		NB count	Normalyzed Fluorescence	Normalyzed Fluorescence
1	2.09908	1.49001		1	1.15332	2.05691		1	1.83499	0.632405
2	1.27972	0.973011		2	0.5983	2.21263		2	1.18597	0.585754
3	1.41202	0.449258		3	0.511709	0.72861		3	0.709634	0.740877
4	0.864119	0.257827		4	0.695783	1.23263		4	0.666551	0.614065
5	0.512489	0.237379		5	0.322558	0.861501		5	1.10885	0.170877
6	0.984061	0.256359		6	0.5011	0.661379		6	0.977852	0.423407
7	0.956576	0.231111		7	0.516606	0.619791		7	1.58975	0.829989
8	1.03314	0.316729		8	1.61345	1.4874		8	0.55083	0.196567
9	0.741537	0.159997		9	1.23477	1.34284		9	0.899055	0.31233
10	1.0934	1.2593		10	1.69387	1.25189		10	0.303051	0.226684
11	0.648167	0.809826		11	1.1513	0.685152		11	0.745483	0.284931
12	1.15359	0.357196		12	0.732862	2.09668		12	0.243314	0.85507
13	0.688404	0.312251		13	0.596339	0.638217		13	0.785416	0.306462
14	1.27804	0.341558		14	0.847261	0.270579		14	0.337332	0.291161
15	1.08885	0.324672		15	0.624972	0.574634		15	0.994704	0.473407
16	1.18421	0.40171		16	0.860047	1.56648		16	0.785787	0.549566
17	0.973326	0.319619		17	1.42795	1.01372		17	1.19701	0.421454
18	0.800192	0.539911		18	1.63528	0.89536		18	1.45238	0.320805
19	1.20799	0.493236		19	0.420044	0.797852		19	0.537091	0.248152
20	1.93447	0.639477		20	0.990598	0.671282		20	1.20324	0.237691
21	0.514261	0.495373		21	0.724364	0.346342		21	1.17956	0.32493
22	0.623382	0.403864		22	0.915425	0.53216		22	2.06503	0.13901
23	1.2438	0.266905		23	0.535018	0.930299		23	1.62707	0.285488
24	0.637169	0.340747		24	0.612211	1.68021		24	1.07353	0.502416
25	0.986248	0.540386		25	1.02082	0.626343		25	1.45902	0.265843
26	0.580434	0.401361		26	0.875641	0.630068		26	0.362471	0.245033
27	0.481342	0.5183		27	1.19253	0.612973		27	1.91619	0.305523
28		0.443852		28	0.517323	0.455279		28	1.91653	0.262985
				29	0.452497	0.350296		29	1.15208	0.327112
				30	0.517823	0.472696		30	0.776459
				31	1.84686	0.33396		31	0.255267
				32	2.35105	0.853841		32	0.329699
				33	0.735071	0.479593		33	0.850708
				34	0.822824	0.510061		34	1.41648
				35	0.69376	0.319043		35	0.845335
				36	1.81086	0.408711		36	0.898904
				37	1.82865	0.819527		37	1.21388
				38	0.693274	0.528139		38	1.72467
				39	1.58158	0.566181		39	1.79481
				40	1.44463	1.03749		40	1.5411
				41	2.15859	0.705004		41	0.645424
				42	1.32797	0.373251		42	0.358542
				43	0.645371	0.779999		43	0.6847
				44	0.437957	0.37504		44	0.826466
				45	0.905091	0.704679		45	0.825195
				46	1.27607	0.834976		46	1.5251
				47	1.17578	0.342229		47	1.18963
				48	0.708497	0.381625		48	1.2362
				49	0.491582	0.424921		49	1.07651
				50	0.491264	0.753791		50	1.43986
				51	1.01924	2.19241		51	0.191898
				52	0.958884	0.928734		52	0.344204
				53	0.455287	0.768988		53	0.675466
				54	0.63189	1.15		54	0.453361
				55	1.25084	0.836464		55	1.12976
				56	1.12487	0.927421		56	1.58636
				57	0.411014	0.751648		57	1.07873
				58	1.60392	0.626791		58	0.603745
				59	0.437076	1.19889		59	1.18074
				60	1.94765	1.07423		60	0.94518
				61	0.790746	0.553531		61	1.80325
				62	0.761696	0.964946		62	0.361853
				63	0.774709	0.726287		63	0.167915
				64	0.906954	0.386122		64	0.995956
				65	1.04832	0.353682		65	0.798456
				66	2.38695	0.423489		66	0.942322
				67	1.15681	0.910315		67	1.22478
				68	1.68	0.493628		68	1.26047
				69	0.687609	0.341467		69	0.75609
				70	1.26512	0.266888		70	1.18474
				71	0.534613	0.639843
				72	0.49872	0.685311
				73	0.494329	0.687323
				74	0.66398	0.68944
				75	0.90342	0.380619
				76	0.920578	0.31648
				77	0.294748	0.42595
				78	0.825091	0.673293
				79	0.968878	0.416703
				80	0.70189	0.325707
				81	1.18087	0.489967
				82	0.56206	0.620997
				83	0.654047	0.38846
				84	1.32899	0.634548
				85	0.770102	0.557949
				86	0.461552	0.517164
				87	0.594363	0.59917
				88	1.04886	0.337582
				89	0.824265	0.419225
				90	1.13474	0.476144
				91	0.77949	0.495511
				92	0.791288	0.616825
				93	1.69025	0.242225
				94	0.736422	0.532938
				95	0.800913	0.392094
				96	0.461506	0.260593
				97	0.420843	0.446684
				98	1.85707	0.418597
				99	1.60326	0.869663
				100	2.81186	0.326684
				101	2.0801	0.314632
				102	2.04731	0.543807
				103	1.83819	0.240378
				104	1.00288	0.271041
				105	1.12061	0.457566
				106	1.05822	0.329017
				107	0.635827	0.325473
				108	0.823438
				109	0.983484
				110	1.10762
				111	0.797913
				112	0.967527
