# Supplementary material for: Anterior CNS expansion driven by brain transcription factors
Source: eLife journal article supplement (doi:10.7554/elife.45274), 2019-07-04

# Figure 2-figure supplement 3

Brain TF co-misexpression increases proliferation but not cell cycle speed

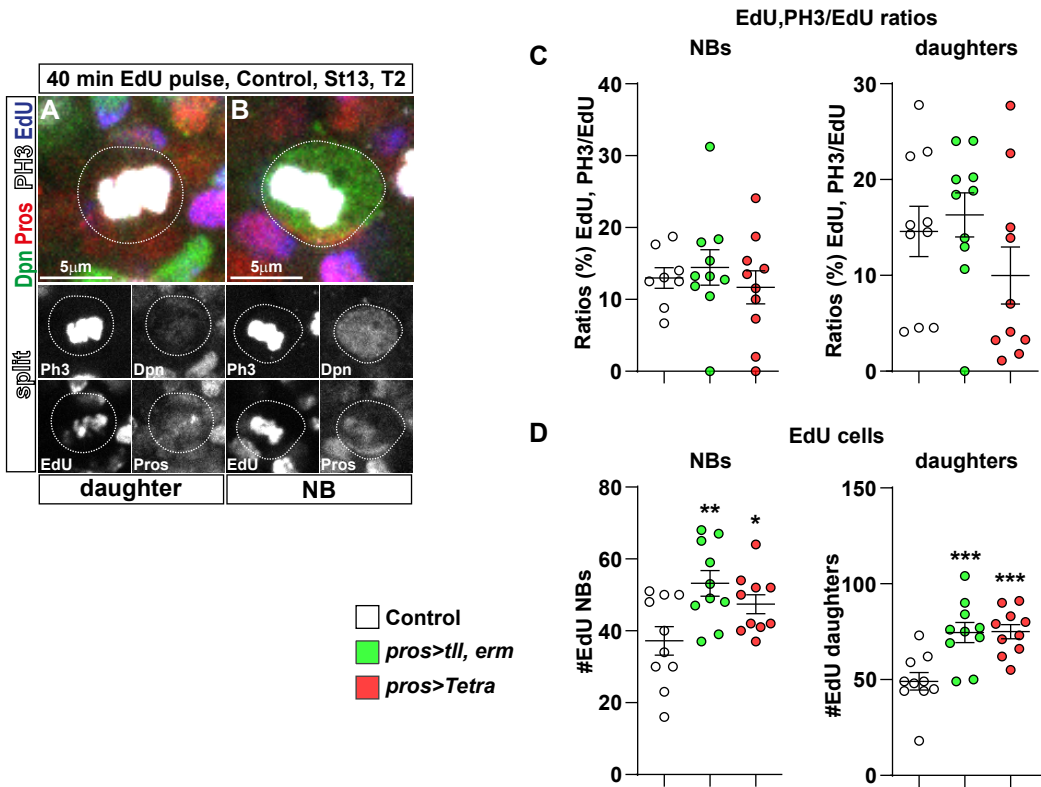

Supplement: supp [file elife-45274-supp-v1.zip]
