# Supplementary figures and images for: Anterior CNS expansion driven by brain transcription factors
Source: eLife journal article supplement (doi:10.7554/elife.45274), 2019-07-04

## Figure 2-figure supplement 2

Tll, Erm and Hbn are expressed in Type II NB lineages

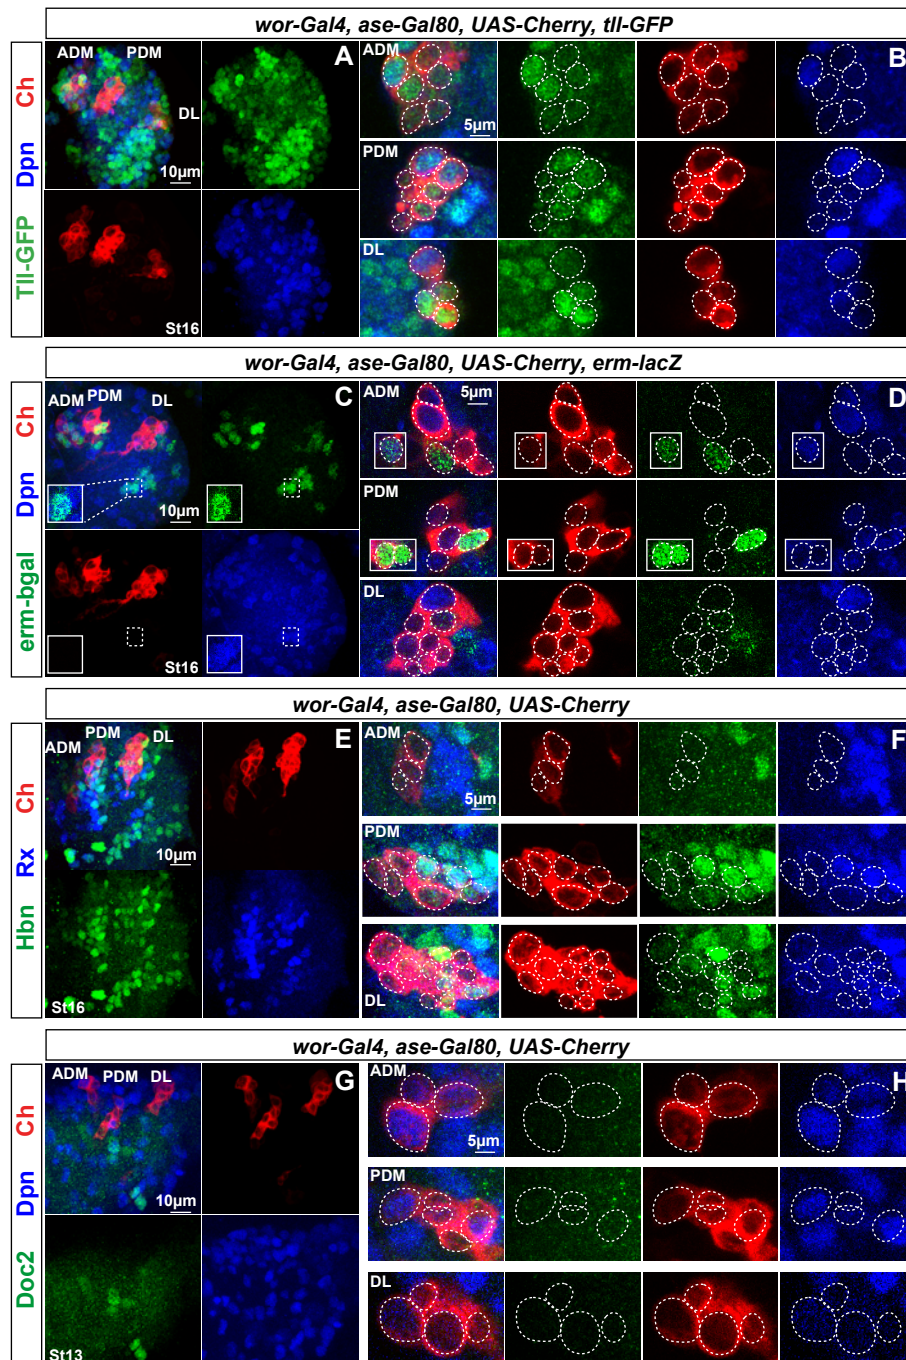

Supplement: supp [file elife-45274-supp-v1.zip]

## Figure 5-figure supplement 5

### Brain TFs trigger NB delamination in wing discs

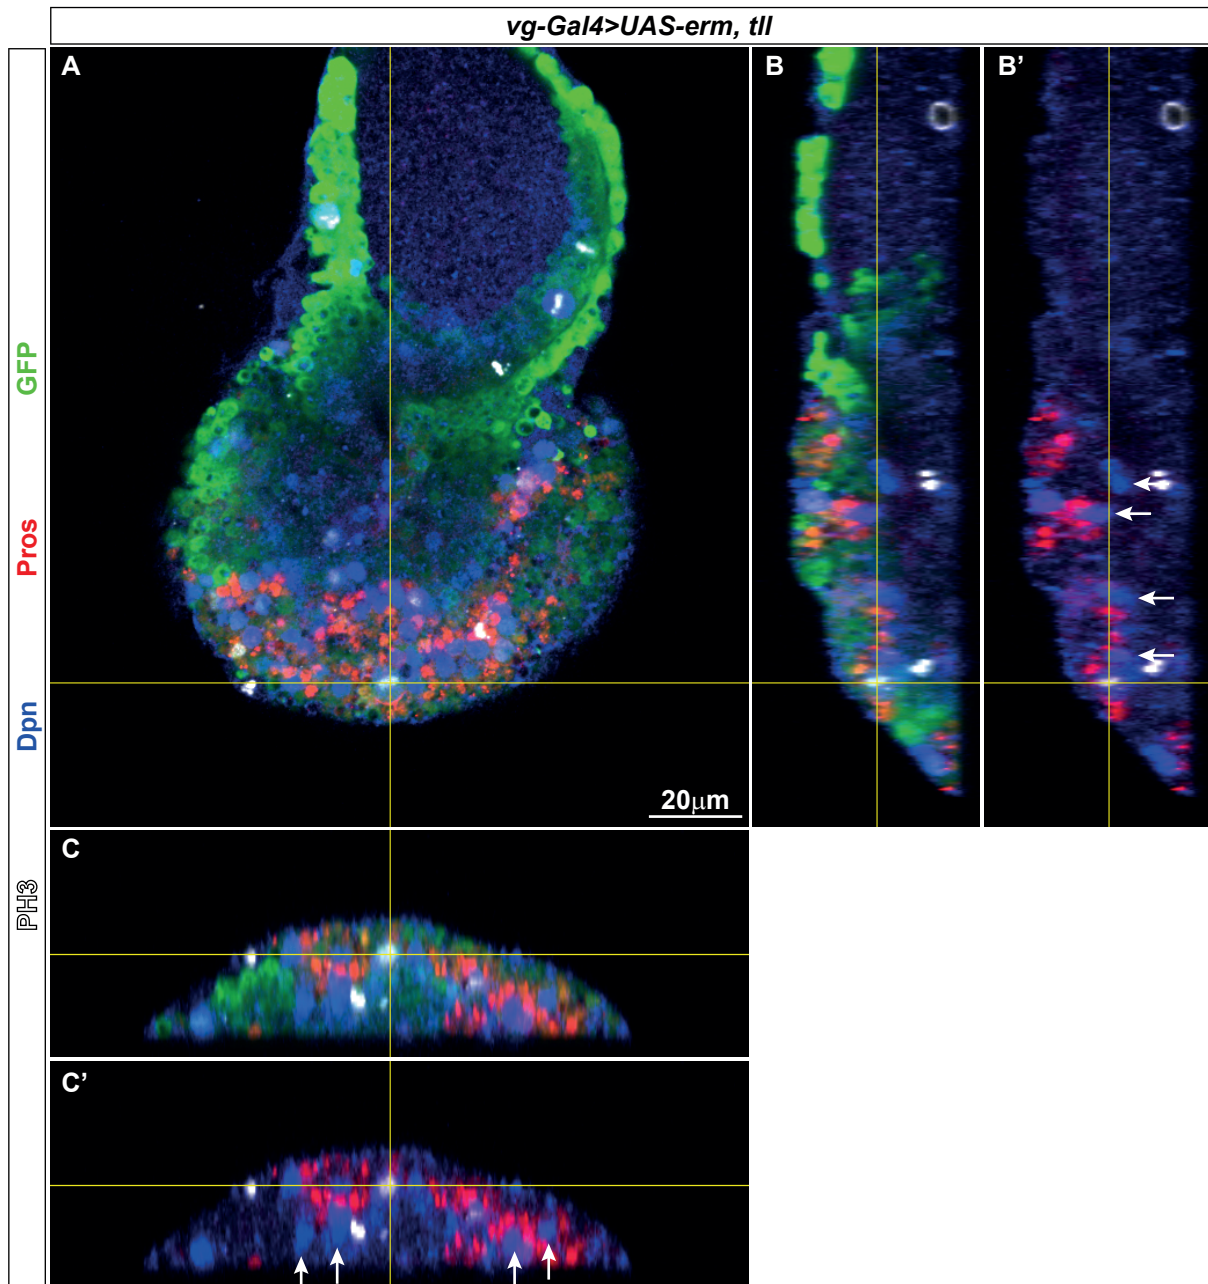

Supplement: supp [file elife-45274-supp-v1.zip]

# Figure 2-figure supplement 1

## Expression of brain TFs

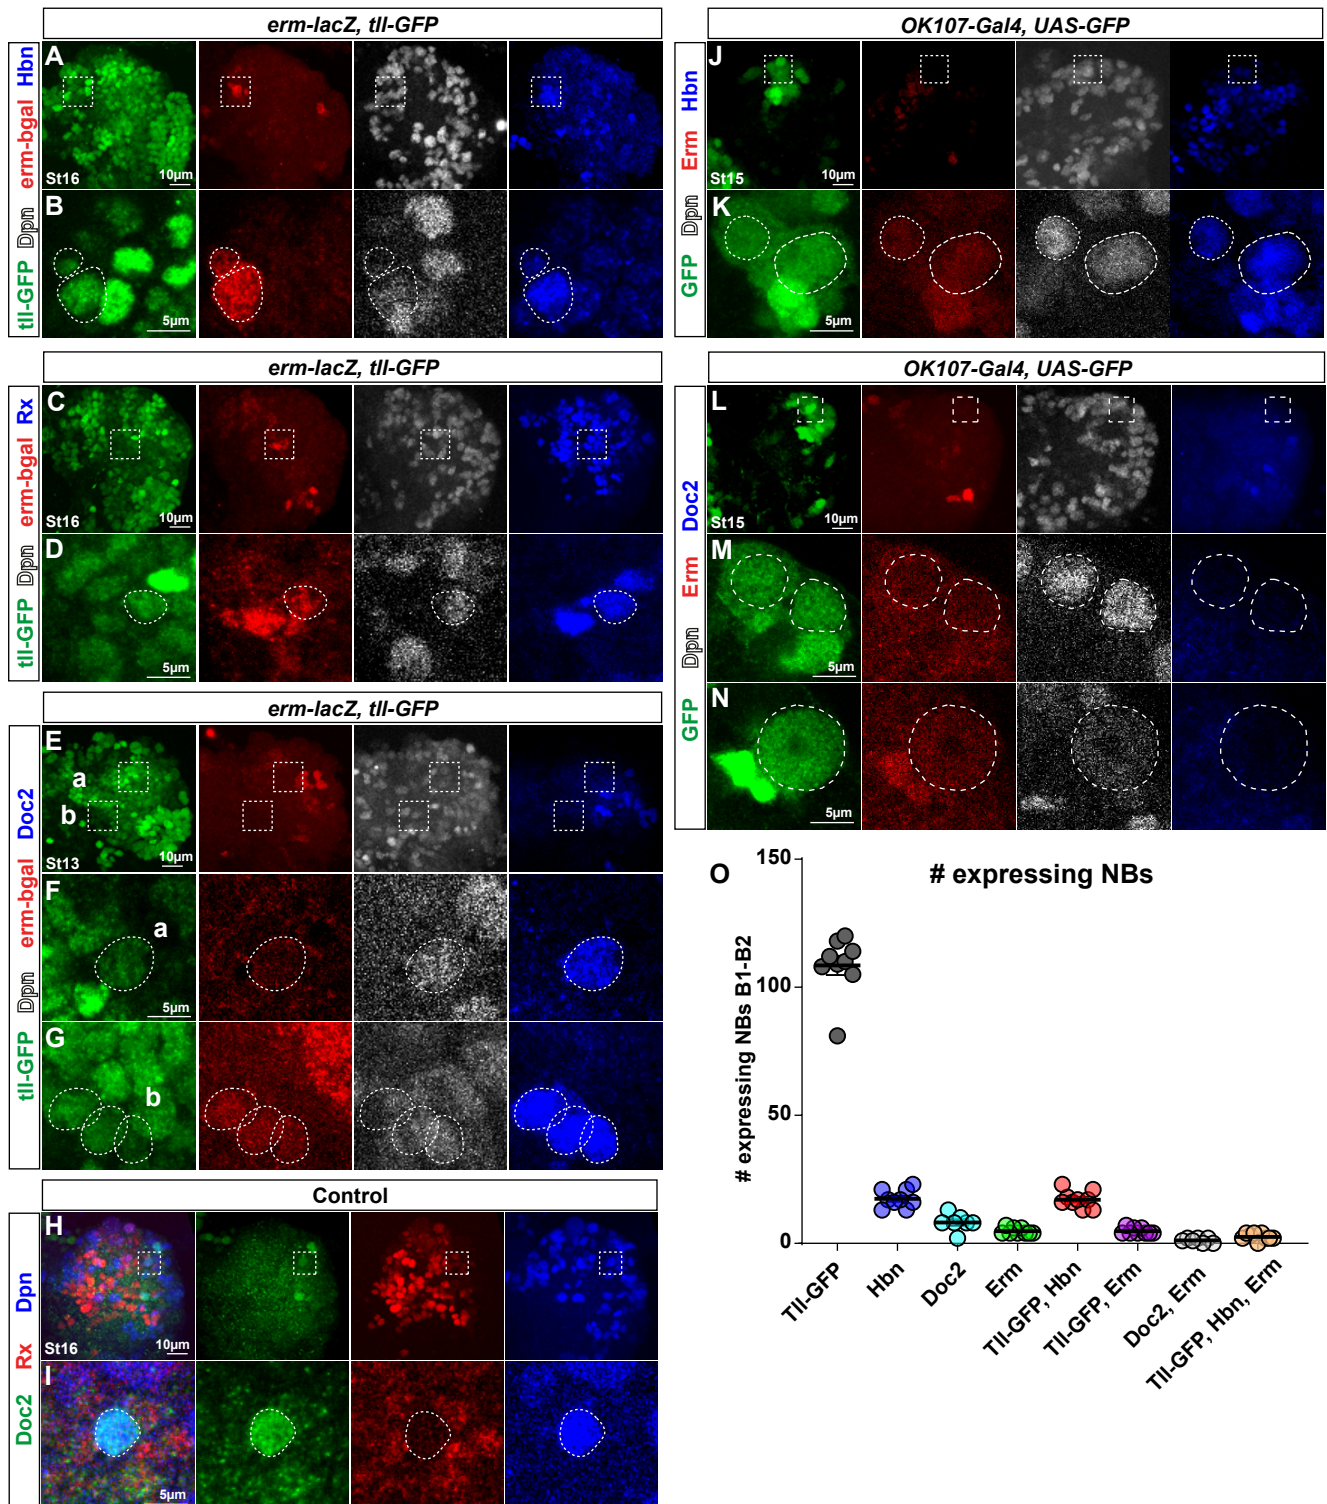

Supplement: supp [file elife-45274-supp-v1.zip]

# Figure 2-figure supplement 4

## Brain TFs control key cell cycle factor expression

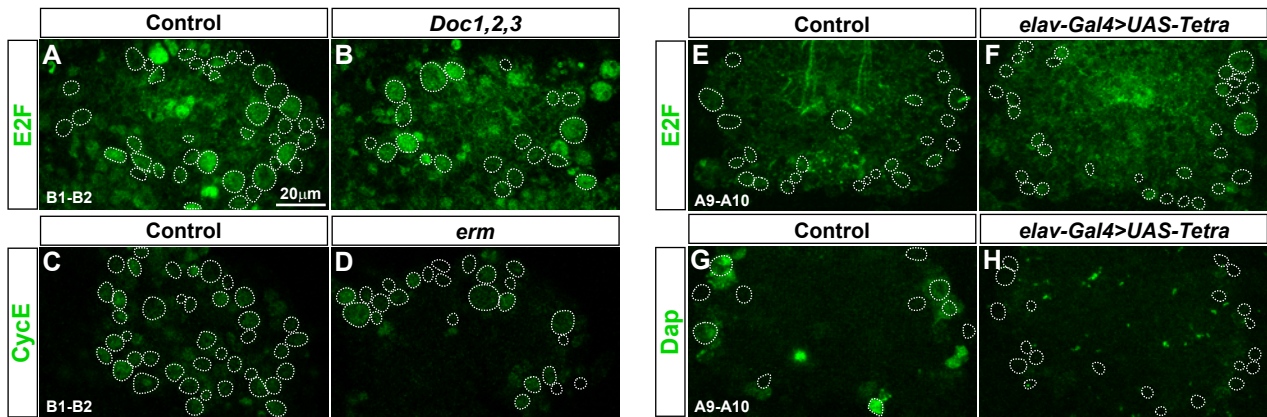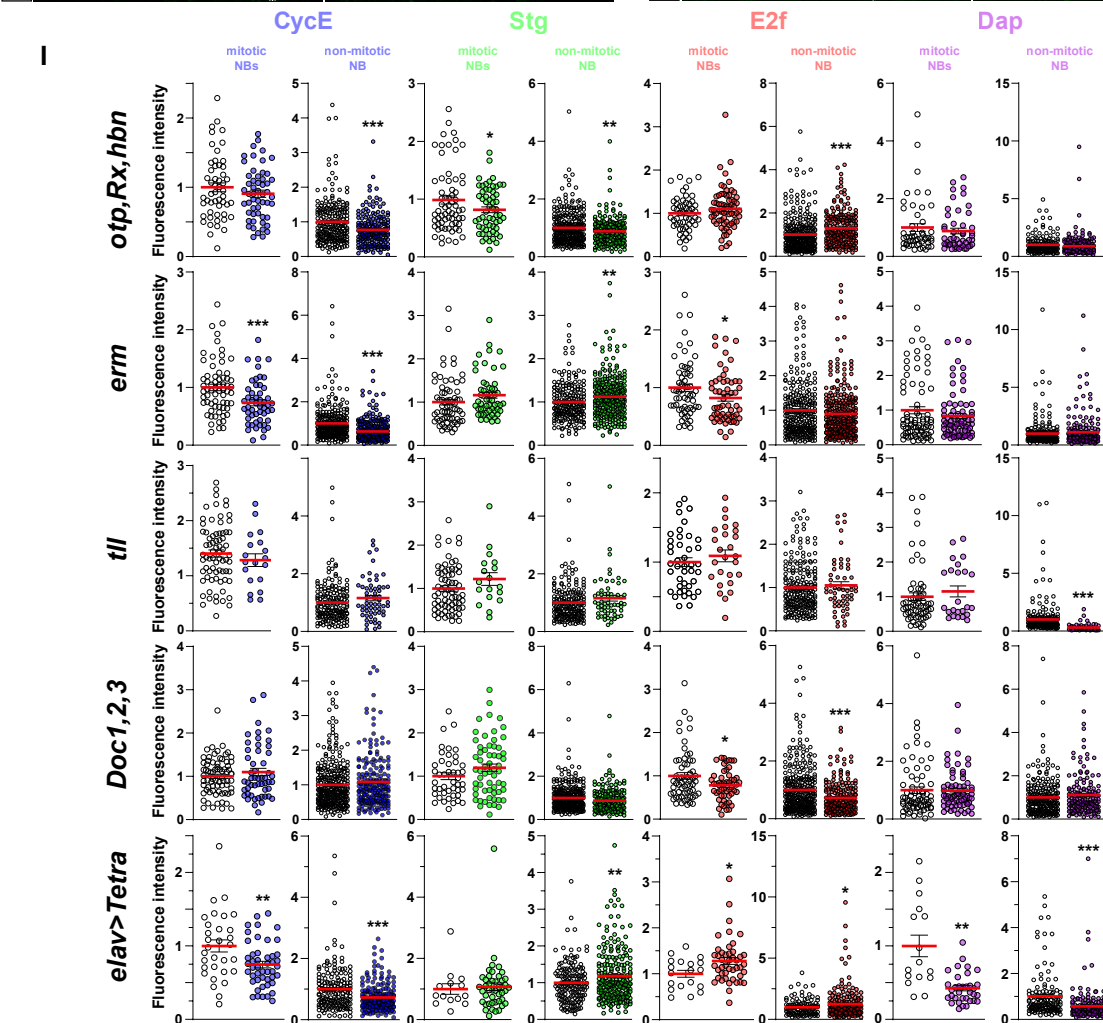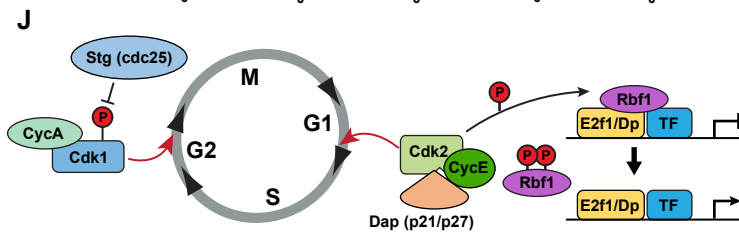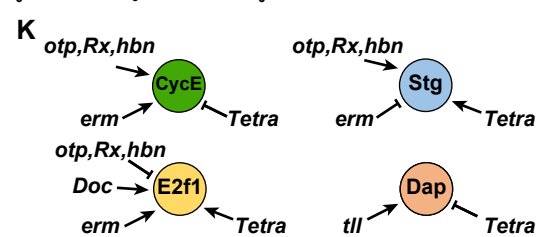

Supplement: supp [file elife-45274-supp-v1.zip]

# Figure 5-figure supplement 4

## Brain TFs trigger wing disc neural reprogramming

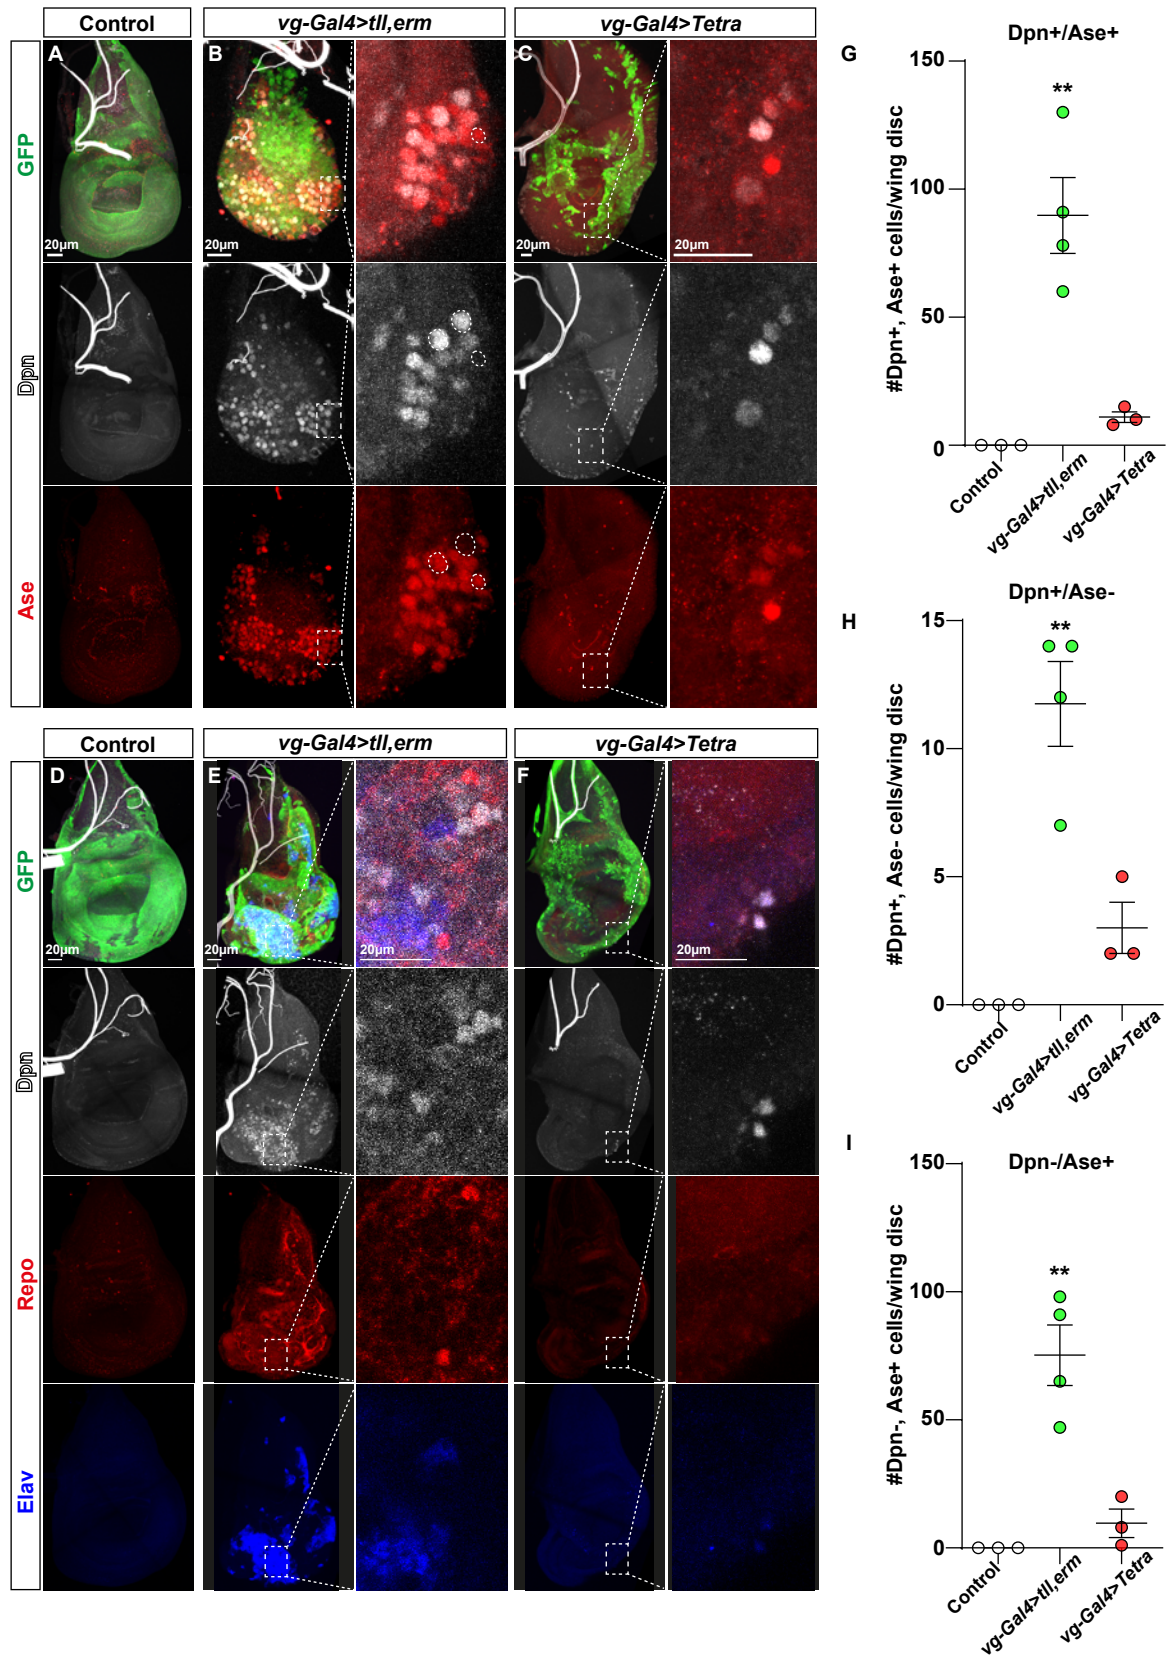

Supplement: supp [file elife-45274-supp-v1.zip]

# Figure 5-figure supplement 1

## Brain TFs trigger wing disc neural reprogramming

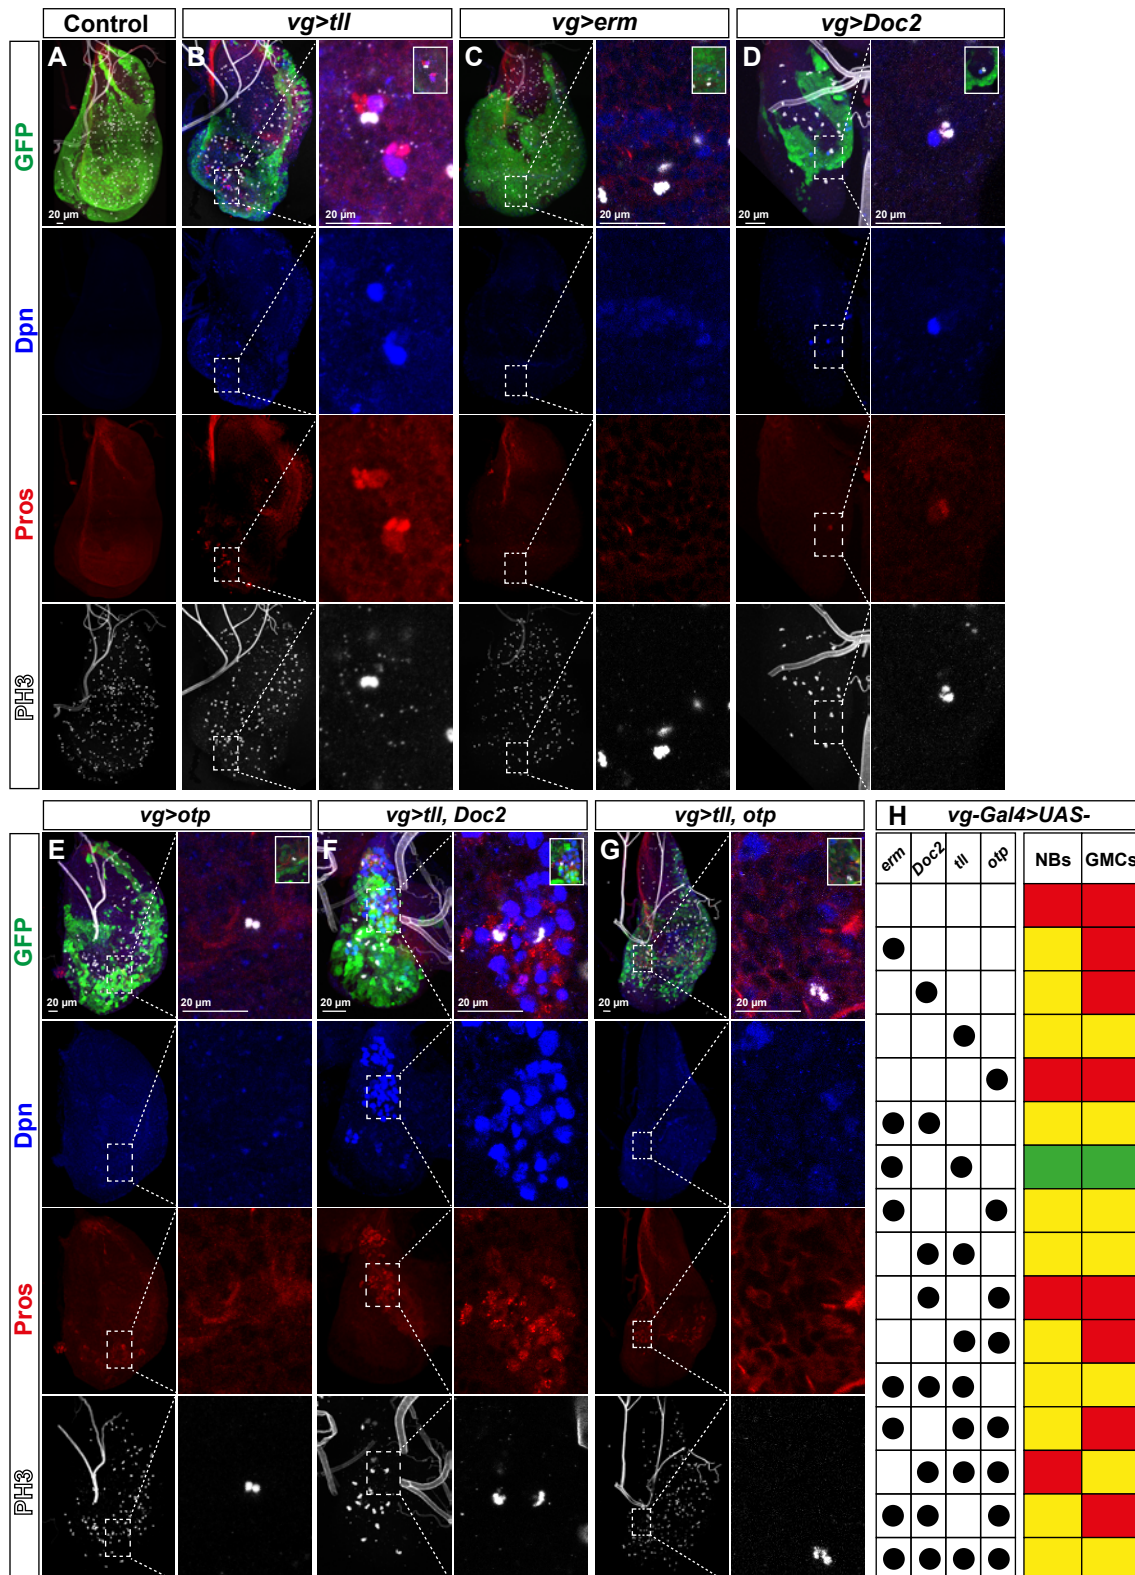

Supplement: supp [file elife-45274-supp-v1.zip]

# Figure 4-figure supplement 1

## Brain TF co-misexpression triggers symmetric NB divisions

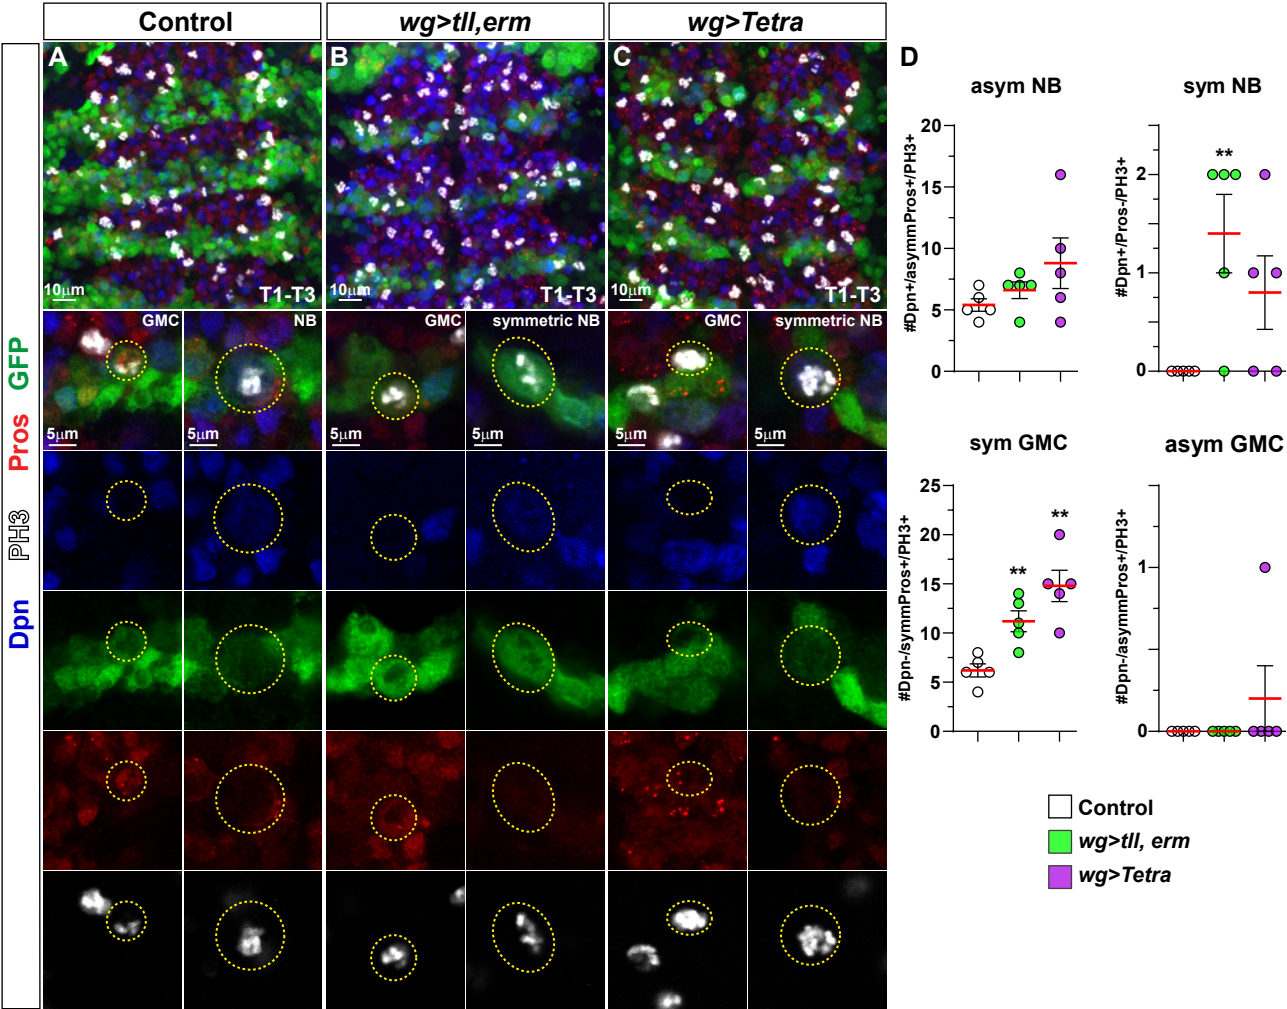

Supplement: supp [file elife-45274-supp-v1.zip]

# Figure 6-figure supplement 1

## Hox genes repress brain TF expression

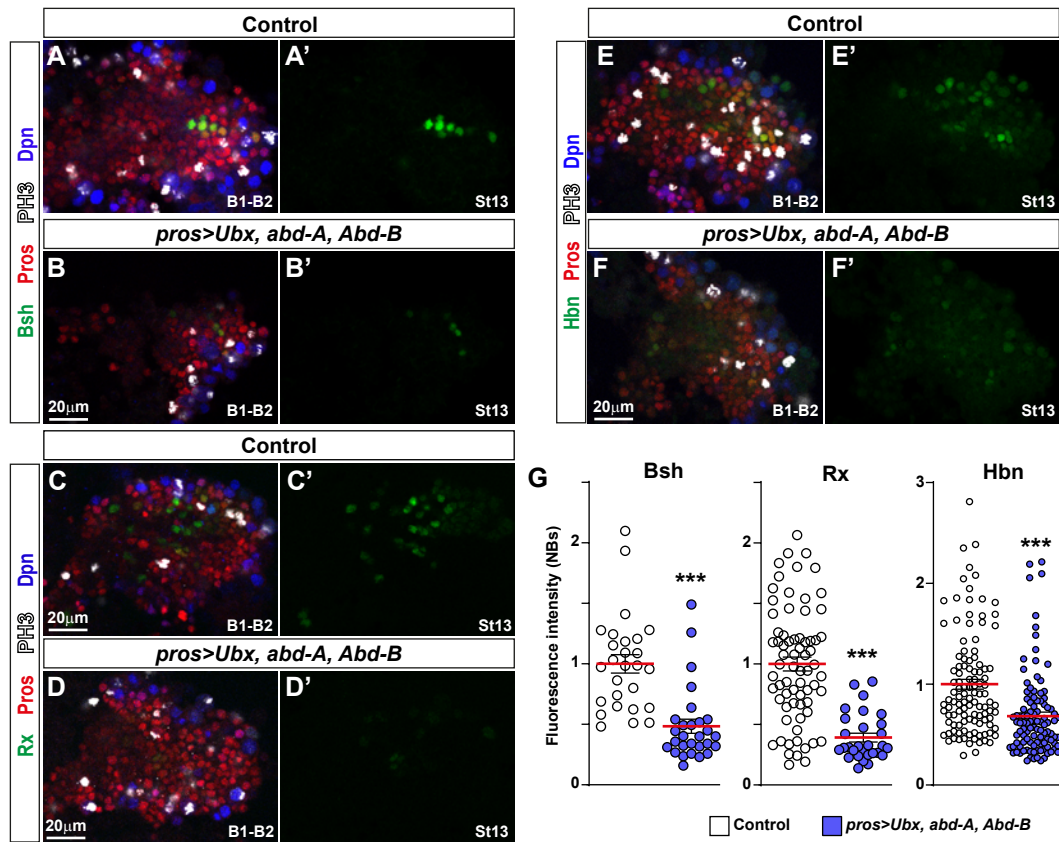

Supplement: supp [file elife-45274-supp-v1.zip]

# Figure 5-figure supplement 2

## Brain TFs trigger wing disc neural reprogramming

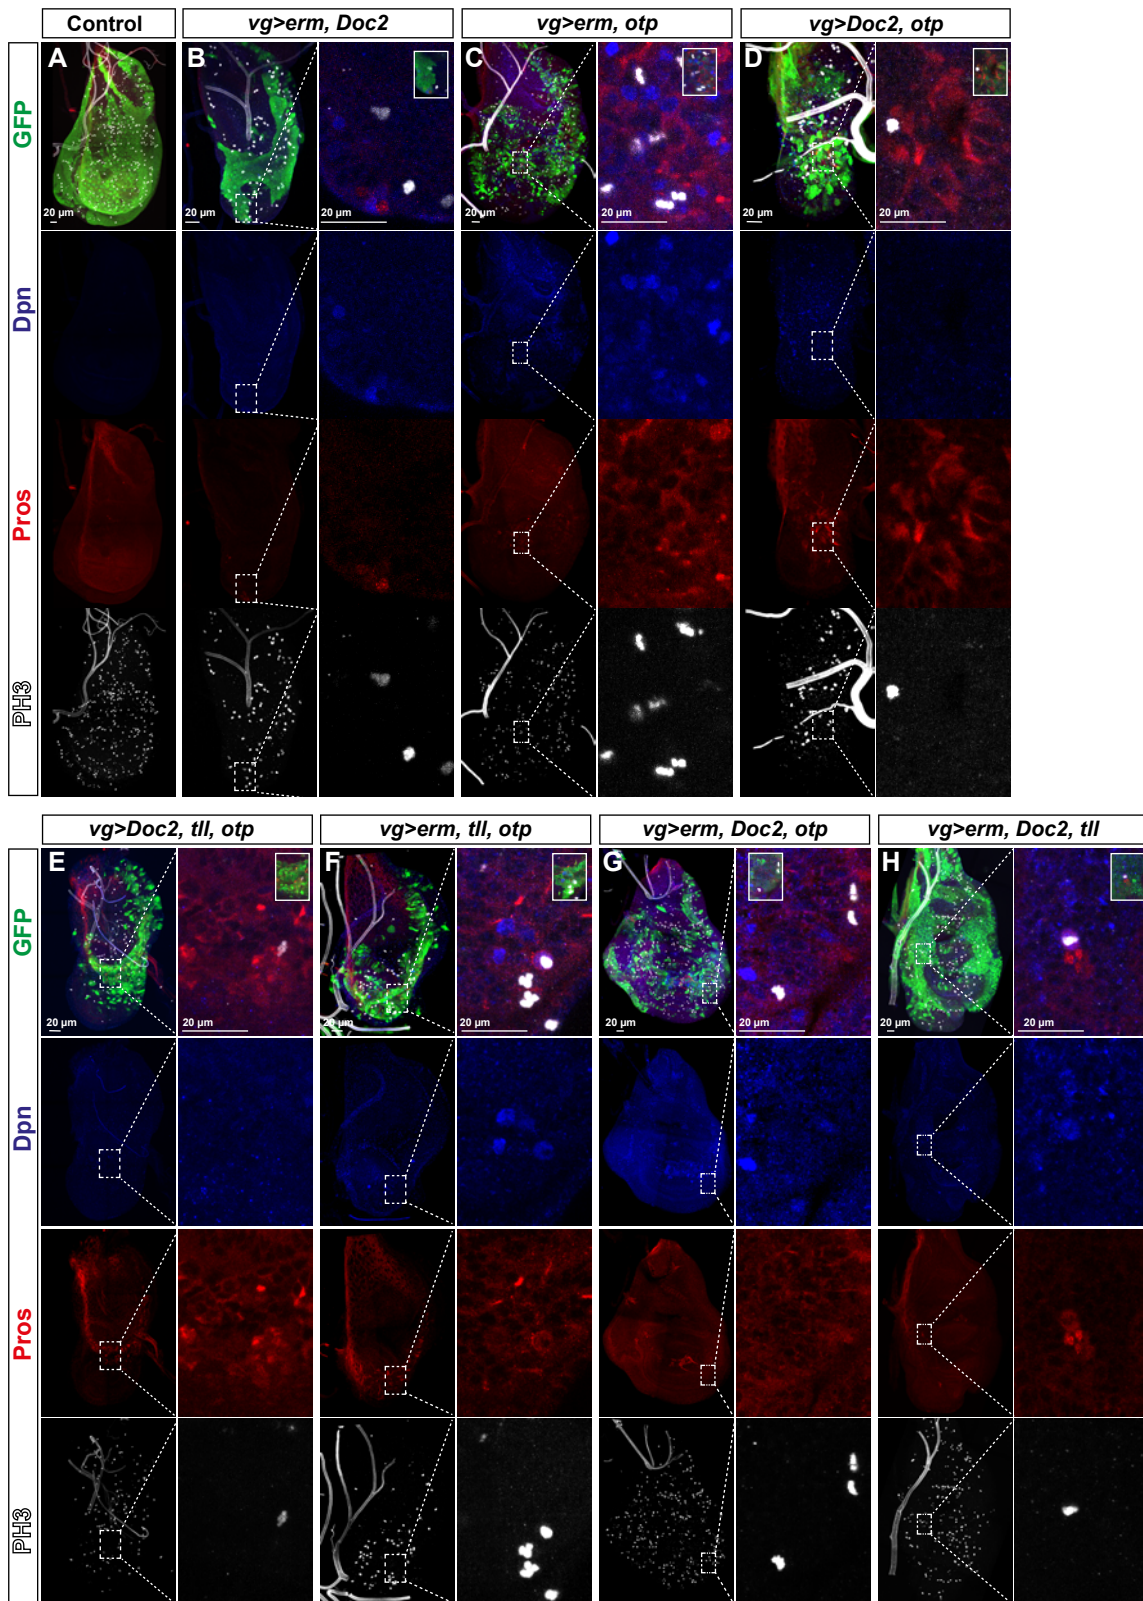

Supplement: supp [file elife-45274-supp-v1.zip]

# Figure 5-figure supplement 3

## Brain TFs trigger wing disc neural reprogramming

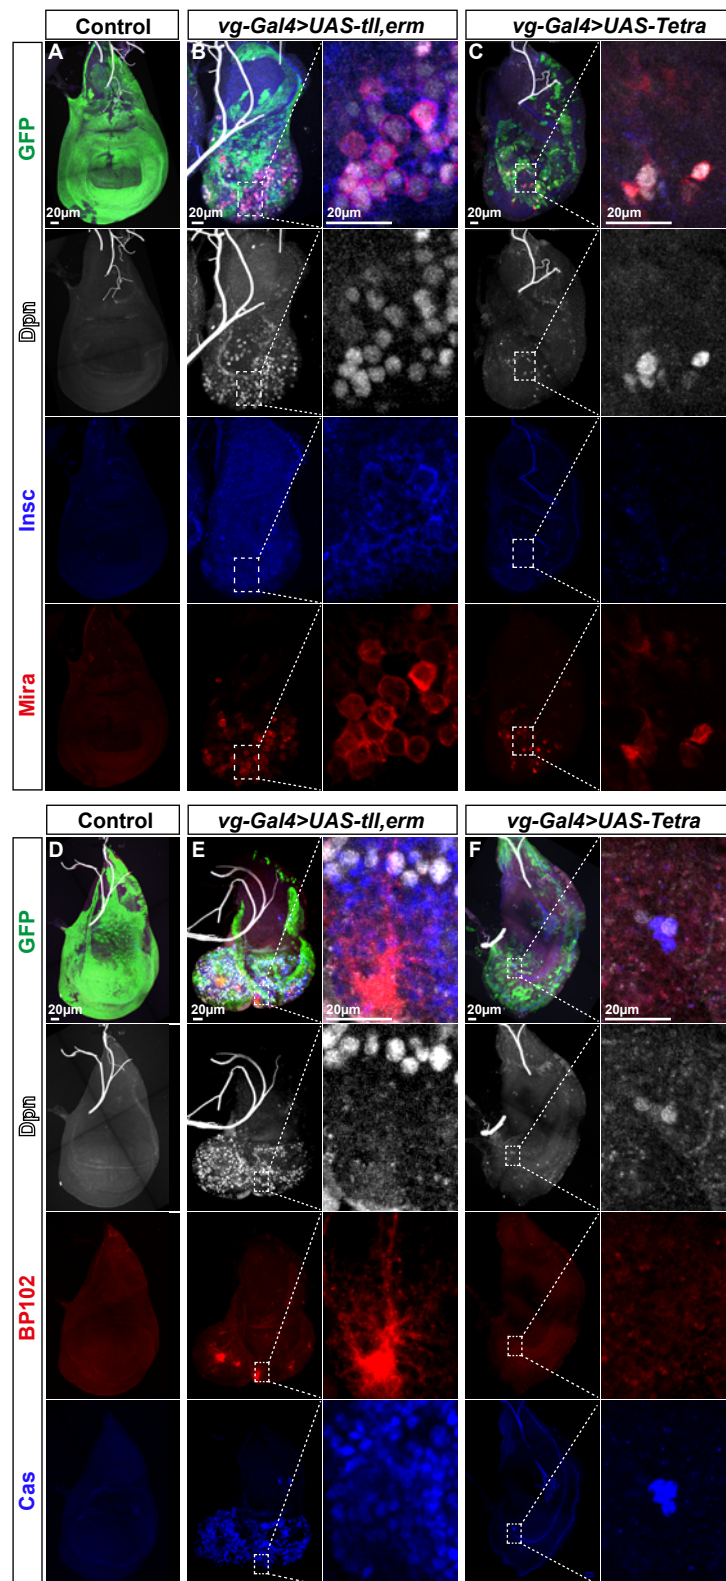

Supplement: supp [file elife-45274-supp-v1.zip]
